# Role of the exercise professional in bariatric surgery: A multimethod analysis for evidence-based recommendations

[PREPRINT – This manuscript has not been peer reviewed yet.]

Matthew A. Stults-Kolehmainen, Ph.D. <sup>a,b,\*</sup>, Dale S. Bond, Ph.D. <sup>c</sup>, Laura A. Richardson, Ph.D. <sup>d</sup>,  
Louisa Y. Herring, Ph.D. <sup>e,f</sup>, Bethany Mulone, R.N., B.S.N., M.S.H.A. <sup>a</sup>, Carol Ewing Garber, Ph.D.  
<sup>b</sup>, John Morton, M.D. <sup>g</sup>, Saber Ghiassi, M.D. <sup>g</sup>, Andrew J. Duffy, M.D. <sup>g</sup>, Ethan Balk, Ph.D., R.D. <sup>a</sup>,  
<sup>h</sup>, Charles J. Abolt, Ph.D. <sup>i</sup>, Matt C. Howard, Ph.D. <sup>j</sup>, Garrett I. Ash, Ph.D. <sup>k,l</sup>, Susannah Williamson,  
Ph.D. <sup>m,n</sup>, Emilian Rejane Marcon, Ph.D. <sup>o</sup>, Melissa De Los Santos, M.S., R.D. <sup>b</sup>, Samantha Bond,  
M.S. <sup>p</sup>, Janet Huehls, M.S. <sup>q</sup>, Osama Alowaish, M.S. <sup>b</sup>, Nina Brojan Heyman, M.S. <sup>b</sup>, and Bruno  
Gualano, Ph.D. <sup>r</sup>

<sup>a</sup> Center for Weight Management, Division of Digestive Health, Yale New Haven Hospital, New Haven, CT, United States

<sup>b</sup> Department of Biobehavioral Sciences, Teachers College – Columbia University, New York, NY, United States

<sup>c</sup> Departments of Surgery and Research, Hartford Hospital/HealthCare, Hartford, CT, United States

<sup>d</sup> School of Kinesiology, University of Michigan, Ann Arbor, MI, United States

<sup>e</sup> University Hospitals of Leicester NHS Trust, Infirmary Square, Leicester, England, United Kingdom

<sup>f</sup> NIHR Leicester Biomedical Research Centre, Leicester Diabetes Centre, Leicester General Hospital, Leicester, England, United Kingdom

<sup>g</sup> Division of Bariatric and Minimally Invasive Surgery, Department of Surgery, Yale University School of Medicine, New Haven, CT, United States

<sup>h</sup> Department of Nutrition and Food Studies, New York University, New York, NY, United States

<sup>i</sup> Earth and Environmental Sciences Division, Los Alamos National Laboratory, Los Alamos, NM, United States

<sup>j</sup> Department of Marketing & Quantitative Methods, University of South Alabama, Mobile, AL, United States

<sup>k</sup> Center for Medical Informatics, Yale School of Medicine, New Haven, CT, United States

<sup>l</sup> Center for Pain, Research, Informatics, Medical Comorbidities and Education Center (PRIME), VA Connecticut Healthcare System, West Haven, CT, United States

<sup>m</sup> Center for Military Psychiatry and Neuroscience, Walter Reed Army Institute of Research (WRAIR), Silver Spring, MD, United States

<sup>n</sup> Army Educational Outreach Program, Rochester Institute of Technology, United States

<sup>o</sup> Department of Bariatric Surgery, Hospital de Clínicas de Porto Alegre, Porto Alegre, Brazil

<sup>p</sup> College of Applied Health Sciences, University of Illinois at Chicago, Chicago, IL, United States

<sup>q</sup> UMass Memorial Weight Center, UMASS Memorial Medical Center, Worcester, MA, United States

<sup>r</sup> Applied Physiology & Nutrition Research Group, School of Medicine, University of São Paulo, São Paulo, Brazil

**Running head:** Exercise professional in bariatric surgery

**\*Correspondence:** Matthew A. Stults-Kolehmainen, Ph.D., Division of Digestive Health, Yale New Haven Hospital, 8 Divine Street, North Haven, CT, United States. 06473. E-mail address: [matthew.stults@ynhh.org](mailto:matthew.stults@ynhh.org)

## ABSTRACT

**Background:** Physical activity (PA) is important for the long-term health and weight management of patients who undergo metabolic and bariatric surgery (MBS). However, the roles of exercise professionals in clinical MBS settings have not been systematically determined.

**Objectives:** To investigate: (1) who are the professionals implementing PA programming in MBS clinical settings; and (2) what patient-centric tasks do they perform?

**Setting:** Clinical and academic exercise settings worldwide.

**Methods:** This is a multimethod study. A systematic literature review of all bariatric PA programs was conducted. Data about job tasks were extracted, reduced and provided to a panel of 10 experts to sort into categories. Cluster analysis was utilized to find the hierarchical structure of tasks. A Delphi process was used to agree on a final model, and then the literature was recoded for higher order job task categories.

**Results:** The majority of PA professionals were exercise physiologists in the USA and physiotherapists or other types of exercise professionals elsewhere. Forty-three tasks were identified, the most reported being: supervision of exercise, fitness testing, and exercise prescription. Higher-order categories were: (1) Exercise-related health assessment, (2) Body composition and physical fitness assessment, (3) Lifestyle physical activity and sedentary behavior assessment, (4) Education, instruction, and prescription, (5) Exercise monitoring, (6) Behavioral counseling and psychosocial support, and (7) Dietary support. The most common skills reported in the literature were: supervision of exercise, fitness testing, exercise prescription, heart rate monitoring, and physical activity counseling. The following statements were rated an average of 9.0, signifying “imperative” was indicated by all respondents: 1) “Pre- and post-operative PA/exercise guidelines for bariatric surgery patients are needed”, 2) “Bariatric surgery programs need to include PA/exercise as part of multidisciplinary care”.

**Conclusions:** Our expert group of bariatric exercise professionals, allied clinicians, and scientists reached a consensus on 7 major classifications of job tasks for the exercise professional. It is important for governing medical associations across the world to formally recognize experienced exercise professionals as playing pivotal roles in continuing, multidisciplinary care for bariatric surgery patients. These findings provide evidence-based guidance on how to solidify these positions within the greater context of healthcare.

**Keywords:** Bariatric surgery, physical activity, implementation, exercise prescription, mixed methods, qualitative

## Highlights

1. Most exercise professionals in MBS settings are exercise physiologists.
2. Results identified 43 patient-centered tasks, which divided into 7 major categories.
3. The most common tasks were exercise prescription, supervision, and fitness testing.
4. Tasks performed varied marginally by the type of exercise professional.
5. Including exercise in MBS patient care was deemed “imperative” by the Expert Group.

## Introduction

Bariatric surgery yields profound weight loss and health improvements, although there is substantial variability in the amount and trajectories of these outcomes (1). Some of this variability may be attributed to bariatric patients' physical activity behaviors. More moderate-to-vigorous intensity PA, less sedentary behavior, and more steps are associated with greater weight loss, better weight maintenance, better bone health, and improvements in cardiometabolic health parameters (2-5). However, patients overall do not become spontaneously active after surgery. Indeed, an average patient is insufficiently active before surgery and makes only small changes in activity behaviors after surgery, thus remaining insufficiently active (6). In the absence of exercise, several important benefits of bariatric surgery are reversed, even in a short period of time, as has been demonstrated in a recent trial (7-9).

The difficulties that patients experience in making substantial changes in their activity behaviors suggest that they need additional intervention and support to make such changes. Indeed, structured exercise and physical activity programming in combination with dietary counseling may help to optimize and sustain bariatric surgery outcomes (5, 10, 11). Unfortunately, not only are such programs rarely provided in real-world, clinical settings, providers and health services worldwide do not routinely provide simple exercise guidance (12). This may partly be because no established guidelines currently exist for exercise after bariatric surgery. Furthermore, effectively translating exercise programs from clinical trials into clinical practice is difficult to achieve (3, 13-15). Despite these shortcomings, insurance companies often require the provision of exercise counselling as a condition for surgical approval (16).

In the effort to translate physical activity research into clinical practice, Koorts and colleagues (17) developed the PRACTIS Model. According to this framework, several major considerations must be initially targeted, including the clinical population, context/place, intervention characteristics and the people conducting the implementation – the interventionist. While the first parts have been widely discussed in the literature, the last component has been infrequently addressed across the medical literature (15, 18-20). Key questions surrounding exercise personnel include: a) who delivers the intervention, b) what skills, education, and qualifications should they hold, and c) how are they trained and supported? While this critical component of the PRACTIS Model has been addressed in primary care (20-22), it has not received adequate attention in the context of bariatric surgery. Typically, this is not the physician or surgeon, who usually lacks the time and training (23), but it may include an exercise professional (EP) working as part of a multidisciplinary team (24).

Exercise professionals comprise a large and diverse group of individuals all aiming to improve health of patients through physical activity (25). Unfortunately, only recently have guidelines been established to report this information in the scholarly literature (26), and researchers are just beginning to conform to this initiative (27). To fill these important knowledge gaps, the major objective of the current study was to utilize a rigorous multimethod approach (131), including a systematic and scoping review and thematic analysis, to ascertain the prominent clinical exercise job tasks conducted by EPs in a bariatric setting. Secondly, we also evaluated if skills of the exercise professional varied by field (e.g., exercise physiologists vs physiotherapists). In this effort, we also aimed to describe: a) components of exercise and physical activity programs reported in the literature, and b) qualifications, training, and background of the professionals who are delivering the interventions.

## Methods

To appropriately address the research questions, we utilized a blend of qualitative and quantitative methods – The Systematic Clinical/Organizational Role Evaluation (SCORE) technique, which integrates the: AGREE model (28), Content Analysis (29), Card sort (Q) analysis (30), Hierarchical cluster analysis (31), and the Delphi process (32). The AGREE Model for clinical decision making, which has been used for other exercise clinical decisions, like the Physical Activity Readiness-Questionnaire (PAR-Q) (33), was modified for the current task. See Figure 1.

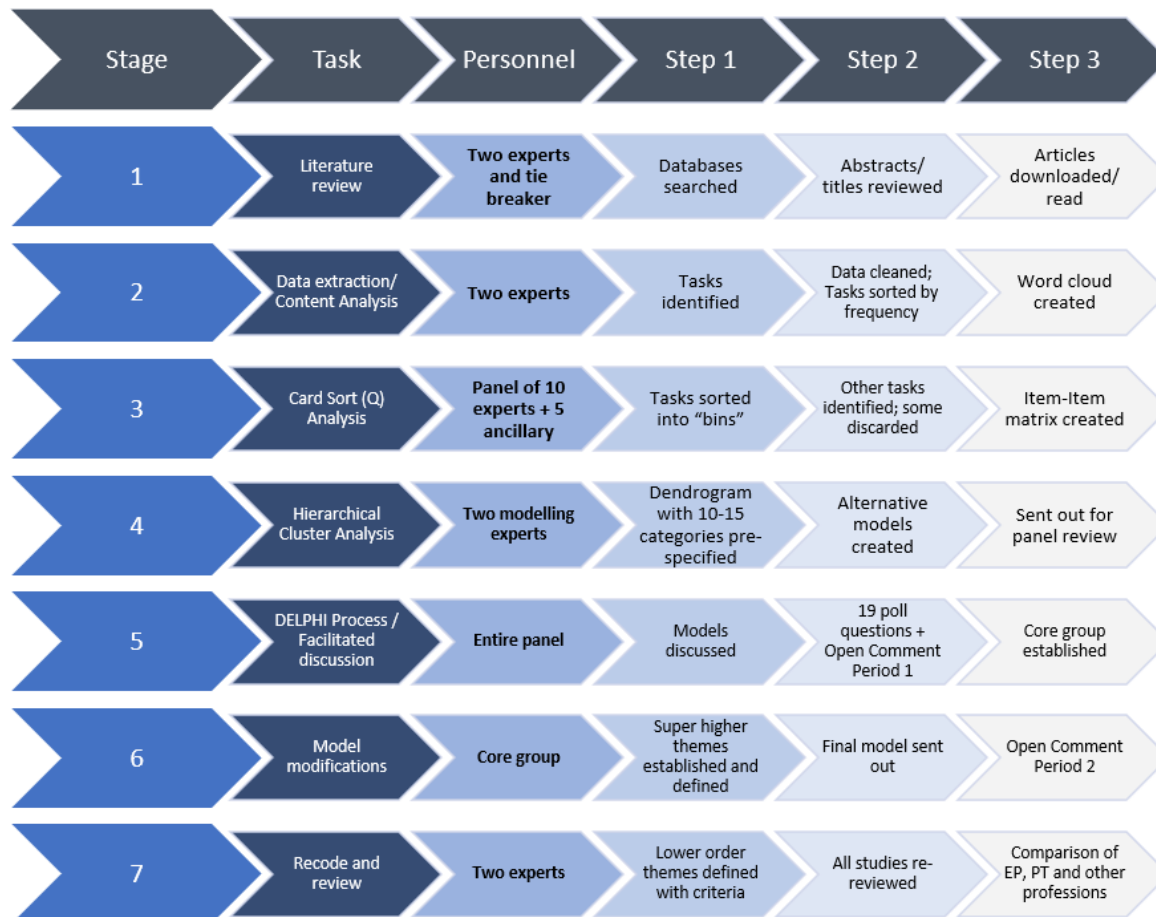

Figure 1. Systematic Clinical/Organizational Role Evaluation (SCORE) technique used in the current study

# Literature review

Per the AGREE model (28), we started with a scoping review of the literature (Stage 1) that took place between June, 2021 and January, 2022 in the Web of Science (Core Collection) and PubMed databases. PRISMA guidelines were followed (34). Titles and abstracts were searched, with the first term being “bariatric” and the second term being “exercise” or “physical activity”. Database results were filtered by language (English and Portuguese only), use of human subjects and studies publishing original data (e.g., eliminating comments, reviews, guidelines, editorials). Duplicate studies were then eliminated. During screening of titles and abstracts, studies were required to describe exercise and physical activity training and/or education programs (e.g., not just observe participants’ PA over time). Refer to Figure 2. Some articles were obtained by scanning: a) review papers, b) personal archives and c) reference lists from all studies obtained, and d) Google Scholar alerts for “Bariatric” and “exercise”. Full text articles were obtained and read for eligibility.

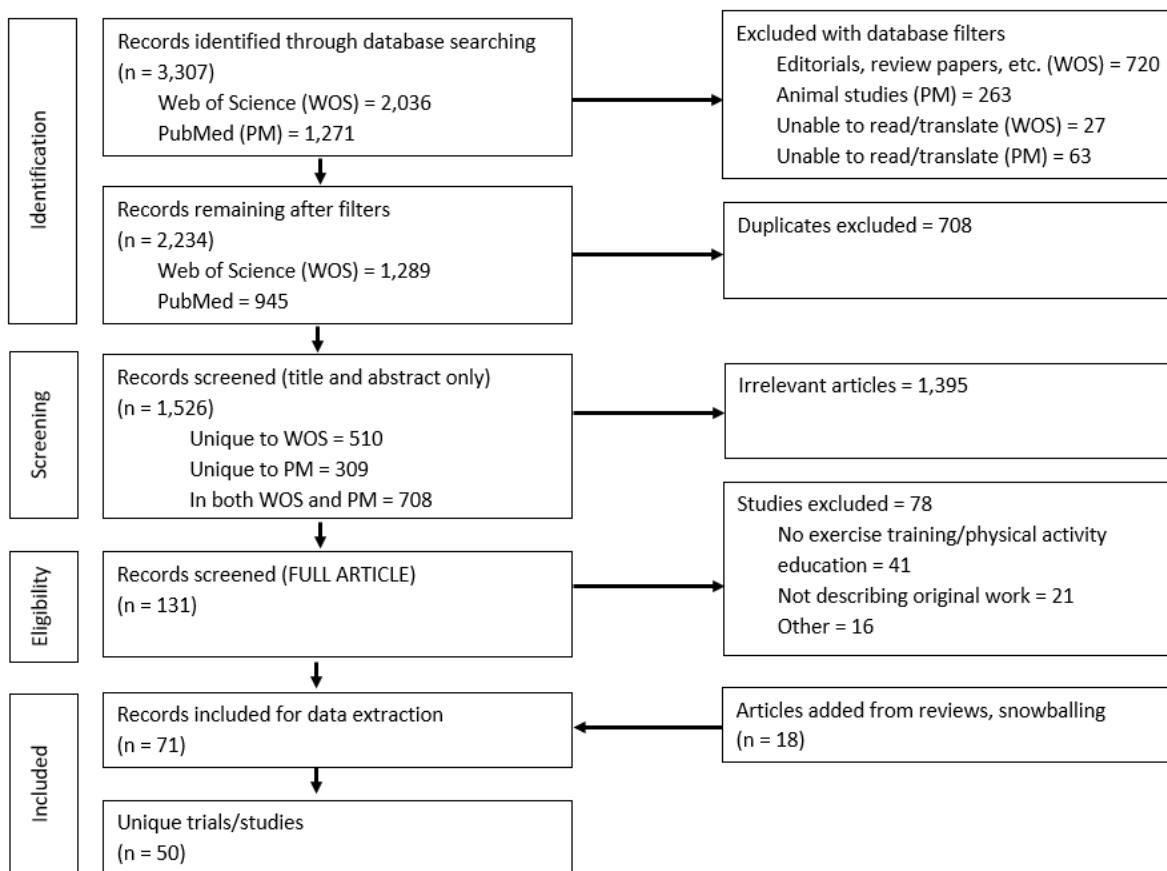

Figure 2. Prisma CONSORT diagram demonstrating the literature search.



## Data extraction

Two investigators (MSK and MD) performed the data extraction (Stage 2), which first proceeded for information related to the “who” of the exercise program (i.e., type of exercise professional who delivered physical activity programming). Any information regarding education, clinical training, credentialing, and affiliation of the exercise professional was also noted. Gathering this type of data presents some difficulty, because: a. most research articles do not directly state what provider/person completed each aspect of the study, b. authorship lists on most studies represent individuals from diverse academic backgrounds, c. not all study personnel are acknowledged, d. the term used to describe exercise professionals varies across geographical regions, such as: exercise physiologist, physical therapist, exercise specialist, trainer, health educator, etc., and e. missing information due to journal space constraints. Consequently, for studies going back to 2010, the corresponding author in each study’s byline was emailed by the first author with follow up questions.

These same investigators then extracted data related to patient-centered (clinical) exercise and physical activity program tasks completed by the exercise professional. To accomplish this, we decided to use a more inductive approach – relying on the bariatric exercise literature itself and not depending, a priori, on definitions of job tasks as stated by documents from various professional organizations about the role of exercise practitioners (35-38), which may or may not be applicable, or may be inaccurate or insufficient in this setting. By “clinical” or “patient-centered”, it is meant that we did not attempt to focus on tasks related to basic science questions (e.g., laboratory assays), administration, or other activities not directly related to patient contact.

An initial list of job tasks was identified through three means. First, by identifying instances where the role of the exercise professional were directly stated (usually as preceded by strong action verbs) (i.e., created the exercise program, screened patients, completed assessments, supervised/monitored training, provided counseling). Second, in studies conducted entirely by exercise physiologists, one would presume that all activities were conducted by these exercise professionals. Third, a corresponding author declared such actions in a personal communication. Two investigators systematically evaluated and interpreted publications independently to minimize bias (MSK and MD).

## Thematic and Card Sort (Q) Analysis

In the third stage, these data were categorized with a mixed inductive thematic analysis (25) and card sort (Q) analysis (30). Data were systematically reduced by MSK and MD, who conducted cleaning and recoding. This included nominalization of verbs. Data were examined: a) first as multiple words (e.g., “heart rate monitoring”) and then, b) connected/adjoined with a hyphen (e.g., “HR-monitoring”) to facilitate visualization. Tasks were then compared for overlap and agreement between investigators. Unique job tasks were entered into a free word cloud program (freewordcloudgenerator.com, Salt Lake City, UT) to visually inspect (black background, rainbow color pattern font), categorize by word frequency, and provide labels (39). See Figure 3.

230  
231

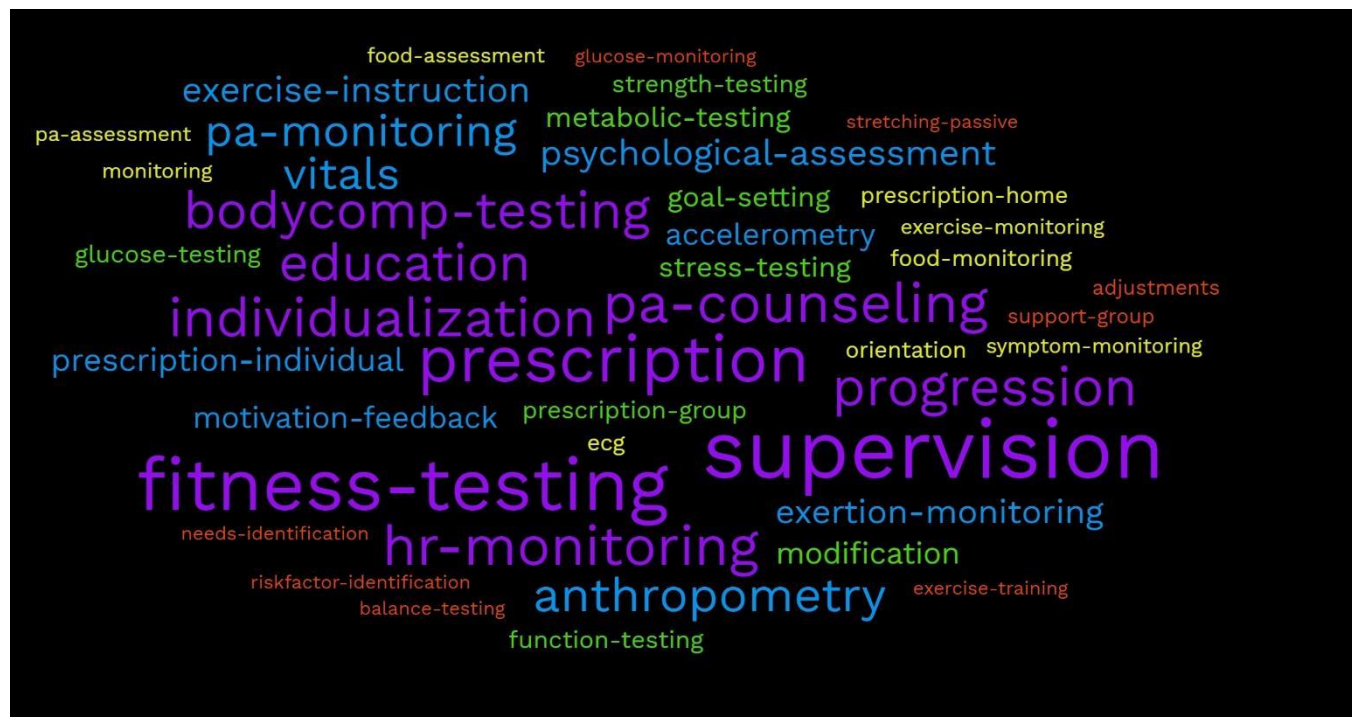

232

233 Figure 3. Word cloud illustrating common exercise job tasks presented to the research team for  
234 the bin sort assignment.

235



An expert group consisting of ten bariatric clinicians, exercise practitioners and scientists (including: four exercise physiologists, two registered dietitians (RDs), one advanced practice registered nurse, one surgeon, and two exercise scientists), along with 5 observers, independently inspected the data, identified related tasks and sorted/categorized these into “bins”/clusters starting with the most frequent job tasks observed. To prevent author word choice from hiding findings (e.g., “body composition testing” vs. “analysis of body composition”), high frequency words were collapsed with similar words and then re-analyzed. The initial goal was 10-15 bins or clusters, based on Hsieh & Shannon (29). Respondents could elect to discard items or suggest new ones. Responses from these ten experts were included into an Item-by-Item matrix, which was used to determine *distance* of each item from the others (30).

#### Hierarchical Cluster Analysis (HCA)

In Stage 4, a hierarchical cluster analysis was then utilized (Matlab v R2022a) (31) to create Dendrogram models based on distance between word items. Two alternative Dendrogram models were generated for group consideration. Both lower order and higher order themes were detected from the dendrograms. To identify higher-order themes (HOTs) (to generate the a priori, 10-15 themes) a *distance threshold* was set to 7. To identify 7 super-higher-order themes (SHOTs), a distance threshold was set to 9.

#### DELPHI Process/ Issues in bariatric exercise survey

In Stage 5, a process of reaching consensus among the expert group and observers was initiated to determine a final list of job task categories and to address related issues, based on the Delphi Technique (32). This included 2 group discussion sessions (both in June, 2022) to: a) review the HCA, b) consider adding, deleting and/or merging tasks, c) consider ranking and ordering items, etc. Then a survey with 19 open and closed questions (in 4 sections) was sent to all respondents. Section 4 included 4 questions about issues in bariatric exercise - rated on a 0 (no importance) to 9 (imperative) scale. Another two weeks were permitted to respond. “Consensus” was defined by > 80% agreement for the first 3 sections of questions and inter-quartile range ( $\leq 2$ ) for section 4. As part of this process, voting permitted a Core Group (MSK, DB, LR and LH) to later make minor clarifications to the model (Stage 6). A final model was presented to the entire panel, with an additional open comment period of two weeks ensuring representation of emerged categories.

In Stage 7, four authors (MSK, MD, OA, LR) established specific criteria to define each HOT (25), as seen in Supplemental Table 1. These criteria defined what explicitly and implicitly constituted each higher-order category, what explicitly was *not* part of each category. A new form/template was then created to re-screen the searchable pdf of all manuscripts for tasks and their properties (e.g., program delivery mode: in-person, home line; format: 1-on-1, group) in each category. The re-review and recode using these forms were completed by two authors (MSK, OA). In some cases, emails were sent to corresponding authors for clarification on study details.

## RESULTS

A total of 63 studies were found describing exercise programs in bariatric surgery, representing 50 unique interventions (many studies had more than one published report). A further search to include all articles related to these interventions increased the total to 71 (7, 8, 10, 16, 27, 40-105) with 57% published after 2015. Over half of the studies were from just two countries – the USA (39%) and Brazil (14%). Exercise programs were mainly conducted in teaching hospitals (38%). The exercise professional delivering the PA programming was firstly an exercise physiologist in the USA (28%; person with graduate degree in EP and /or certification) and a physiotherapist in the rest of the world (43%). A number of other exercise professionals (e.g., physical educators, coaches, personal trainers) were also involved. The majority of articles were “proof of concept” (i.e., addressing the question of whether exercise is beneficial for weight loss) as opposed to implementation. The main component of these programs was supervised exercise training (65%). Later article additions increased this total to 83 (106-117), which were analyzed later. See Tables 1A and 1B.

### Data extraction

Data extraction resulted in 385 tasks across all studies, 43 of which were unique. The 5 most common tasks were: real-time supervision of exercise (36 studies), fitness testing (31), [exercise] prescription (27), heart rate monitoring (21), and physical activity counseling (21). Less commonly described in the literature were: exercise prescription for home, exercise behavioral counseling, and metabolic testing.

### Content analysis / Card sort

Respondents sorted tasks into an average of 11.8 bins, each bin had an average of 3.6 items, and there was an average of 1.8 items deleted per respondent. Respondents suggested 34 items to add (3.4/respondent). Unique items were considered in later rounds. See Table 2.

A heat map of the associations of the original 43 exercise professional job tasks is provided in Figure 4. The items with the strongest association (9 out of 10 raters agreed) were strength testing and physical function testing. Eight out of 10 raters indicated that the following 3 tasks were paired: strength testing/balance testing, fitness testing/function testing, prescription for home/ prescription-individual. Seven raters agreed on 5 pairs, 6 raters - 10 pairs, 5 raters -17 pairs, etc.

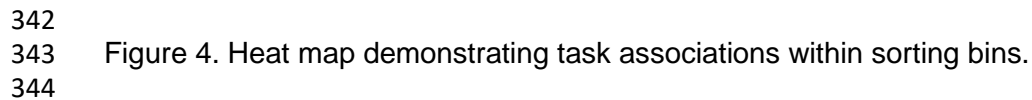

The hierarchical cluster analysis based on this matrix generated two models, which are shown in Figure 5. Model A had a better fit index than Model B, as quantified by the cophenetic correlation coefficient ( $c = 0.85$  and  $0.50$ , respectively), a common statistic that measures the faithfulness with which the similarities between individual items in the original matrix were represented visually in the final dendrogram.

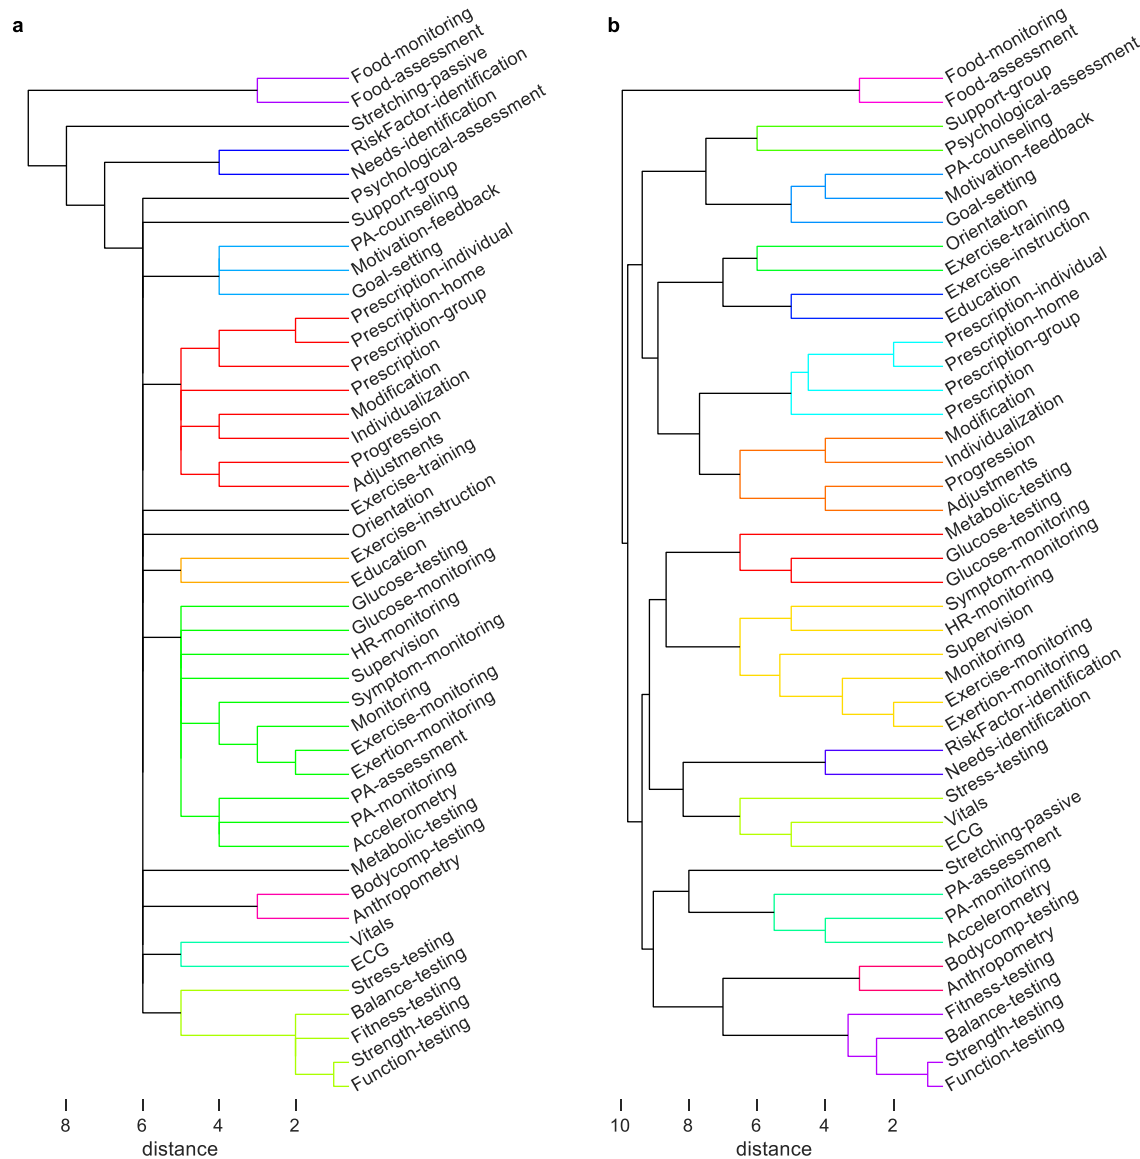

Figure 5. Alternative models (A and B) generated by the hierarchical cluster analysis considered in the Delphi process.

### Delphi process / Core Group

Respondents approved Model B. They indicated that “Passive stretching” should be eliminated and “exercise prescription adherence” should be included. The Core Group eliminated the general “prescription” task. Therefore, the final model included 42 patient-centered exercise tasks (i.e., lower order themes), which divided into 14 higher order themes and 7 SHOTs. The final SHOTs were: (1) Exercise-related health assessment, (2) Body composition and physical fitness assessment, (3) Lifestyle physical activity and sedentary behavior assessment, (4) Education, instruction, and prescription, (5) Exercise monitoring, (6) Behavioral counseling and psychosocial support, (7) Dietary support. The final model passed with a unanimous final vote. See Figures 6-8 and Table 3 for the final model, with descriptions of the SHOTs. Task categories were not ranked, per group consensus, but were further sorted by temporal precedence in a clinical setting (starting with basic assessments).

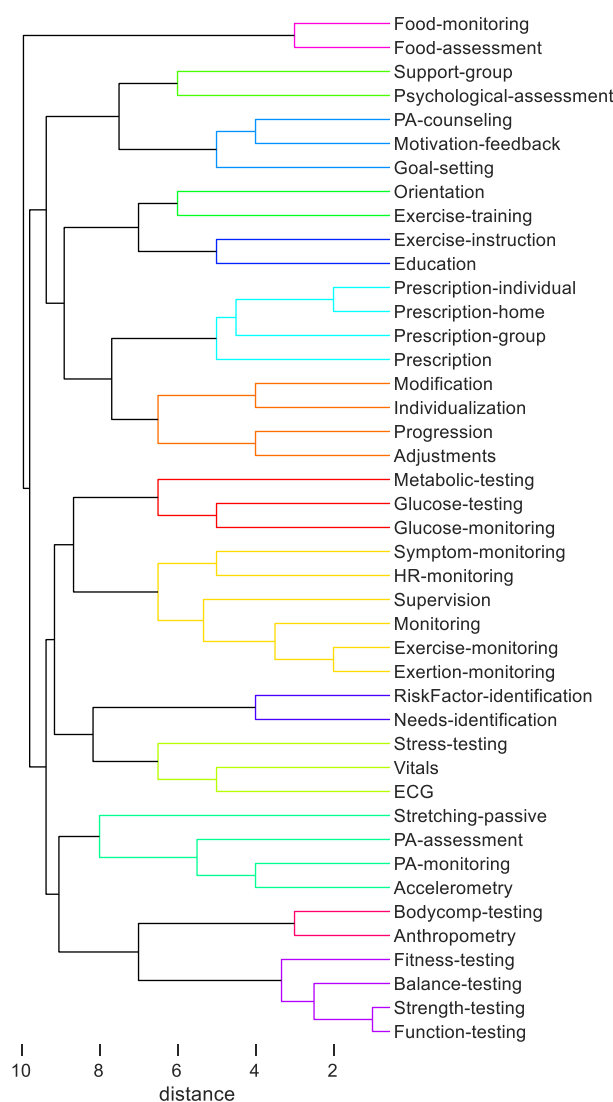

Figure 6. Final hierarchical cluster analysis model

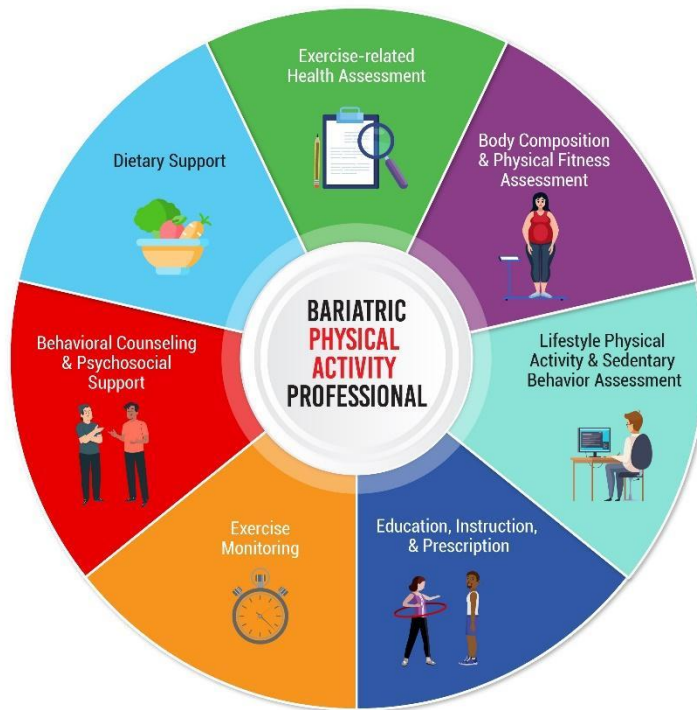

Figure 7. Illustrated final model (Version A) for clinical use.



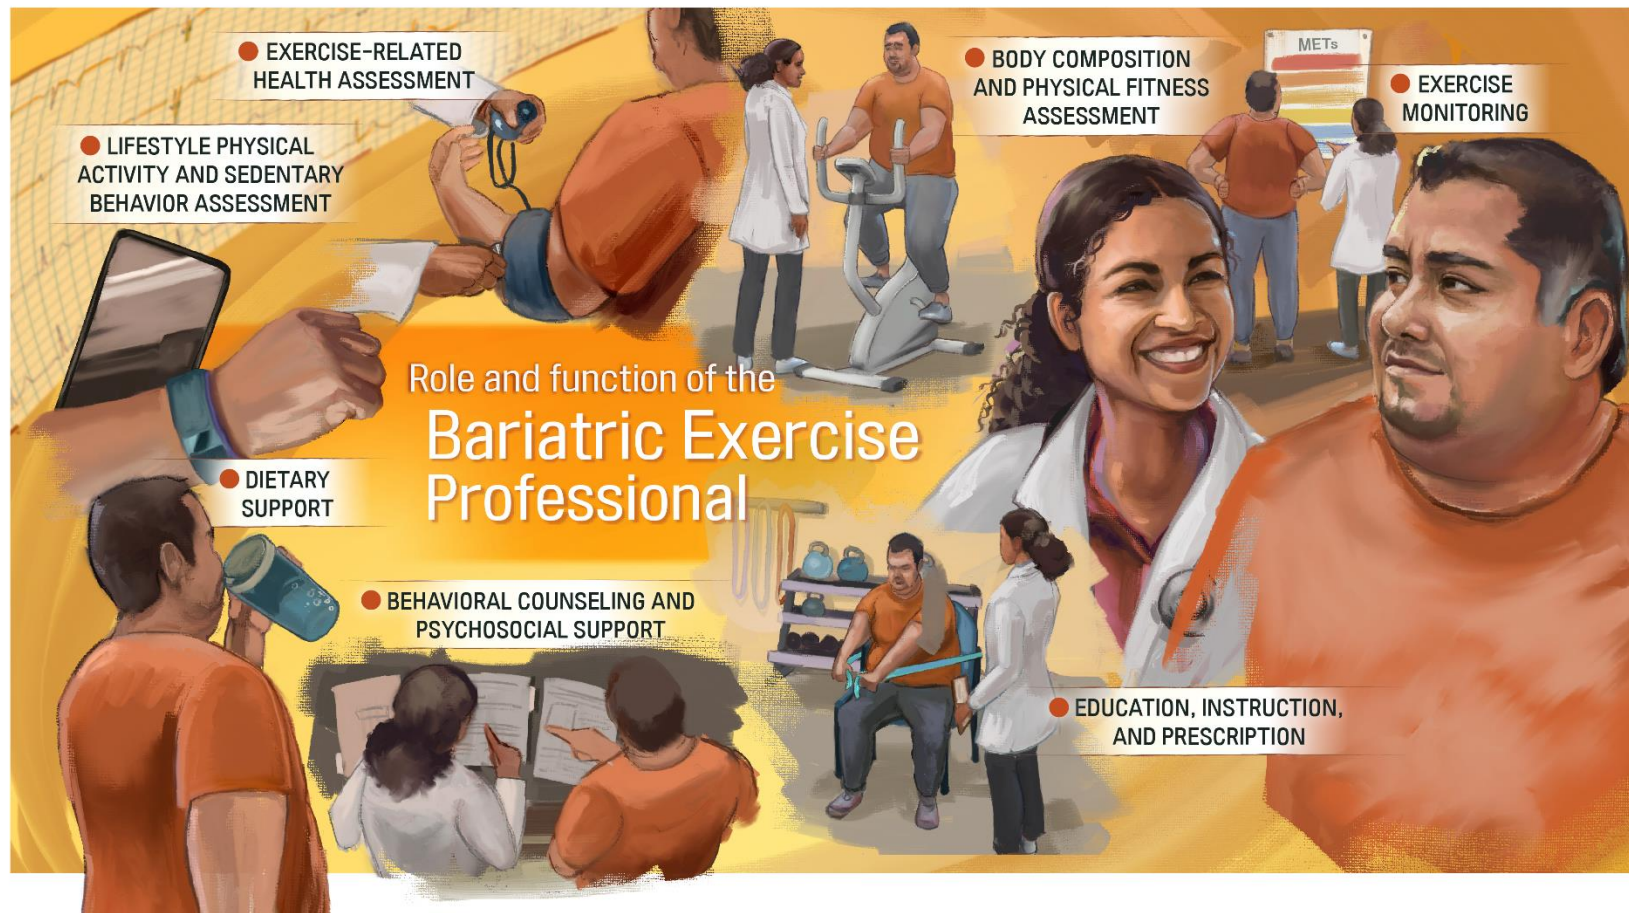

Figure 8. Illustrated final model (Version B) for clinical use

### Issues in Bariatric Exercise Survey

The following statements were rated an average of 9.0, indicating “imperative” was rated by all 10 respondents: 1) “Pre- and post-operative PA/exercise guidelines for bariatric surgery patients are needed”, 2) “Bariatric surgery programs need to include PA/exercise as part of multidisciplinary care”. The following questions were rated by USA respondents, also receiving unanimous agreement that they are “imperative”: 1) Bariatric surgery patients should receive customized and individualized PA/exercise guidance from credentialed exercise professionals with expertise in PA prescription and intervention, 2) Exercise services in bariatric surgery settings should be standardized and reimbursed.

### Re-review

The higher order tasks most represented in the literature were “Real-time monitoring, instruction and feedback” at 73%. The task HOT least represented was “stress testing” at 34%. In the review of differences in tasks performed by profession, two higher-order task categories (HOTs) were different. Exercise physiologists were determined to perform both Psychosocial support (HOT 13) and Dietary support (HOT 14) to a greater degree. See Supplemental Tables 2a and 2b.

## DISCUSSION

Increased PA is essential for the long-term success of bariatric patients and helps to maintain health improvements even in the short-to-medium term (5, 7-10). However, many patients do not become active after surgery. Supports that could offset this inactivity (e.g., PA prescription, counseling, supervised exercise programs) are often not provided as part of clinical care. While there is a clear need for exercise professionals in the multidisciplinary care of bariatric patients, the specifics of their professional background and tasks they perform in a bariatric setting are unclear. To better clarify the roles and rationale for exercise professionals in MBS, we conducted a unique and rigorous multimethod analysis of all exercise programs peri-bariatric surgery. We extracted tasks of the exercise professional, submitted these to an expert group of clinicians for sorting into themes, used a sophisticated analysis to create a hierarchical model of these job tasks, and further consulted the expert group for their unique perspectives.

Overall, our study found exercise professionals perform a large set of job tasks related to the clinical care of the patient. Forty-three identified tasks were classified into 14 higher order themes and then seven super-higher order themes. These 7 included: (1) Exercise-related health assessment, (2) Body composition and physical fitness assessment, (3) Lifestyle physical activity and sedentary behavior assessment, (4) Education, instruction, and prescription, (5) Exercise monitoring, (6) Behavioral counseling and psychosocial support, and (7) Dietary support. The most common skills reported in the literature were: supervision of exercise, fitness testing, exercise prescription, heart rate monitoring, and physical activity counseling. However, the expert group decided to not rank tasks or their categories by commonality but treat them as relatively equal in importance to avoid overlooking other key functions of the exercise professional. Tasks conducted by exercise professionals in bariatric treatment align closely with similar practice in other clinical settings. For instance, our 7 SHOT categories overlapped considerably with core components categories from cardiac rehabilitation (e.g., Psychosocial Management, PA Counseling, Exercise Training Evaluation) (118, 119) and with performance domains from the American College of Sports Medicine (ACSM) clinical exercise physiology credential (e.g., Exercise Testing, Exercise Prescription, Exercise Training and Leadership, Education and Behavior Change) (36). The expert group noted that some tasks should not be included, such as post-operative PA clearance (frequently provided by an advanced practice registered nurse

[APRN], physician's assistant or surgeon). The group also indicated it might be worthwhile including other psychosocial support factors as well, including lessening stigmatization, which may contribute to PA avoidance in bariatric patients (120, 121). Overall, the results indicate that the exercise professional may have skills and abilities to provide a larger role than that suggested by Mechanick (122, 123) and others (124), which appear to limit tasks to "lifestyle medicine evaluation", physical activity counseling, monitoring adherence to PA guidelines and supervising exercise sessions.

How exercise professionals are classified ostensibly varies by country. Research reviewed in this study, demonstrated the exercise professional was most often an exercise physiologist in the USA, and a physical therapist outside the USA, the two professions noted by the ASMB Integrated Health Section (125). It is important to note that in Australia, Canada and the United Kingdom, like the USA, exercise physiologists work independent of physical therapists (126, 127) and in some countries, like Singapore, they may work together. In Brazil, the exercise professional was typically a physical educator. Regardless, our analysis determined that the job tasks exercise professionals conducted in bariatric surgery differed on only two dimensions (Psychosocial support, Dietary support). The expert group did not make any specific recommendations regarding profession, credentialing, or qualifications. Indeed, the experts rated as "imperative" that bariatric patients should have customized exercise guidance from credentialed exercise professionals (regardless of whether the professional is an exercise physiologist, physical therapist, or other qualified professional), and exercise services in the bariatric surgery setting should be incorporated into the reimbursable services of care.

The current study has several notable strengths, the first of which is the broad, robust methodological approach used address the topic, which provided several levels of confirmative evidence for the results. Additionally, the expert group included a multidisciplinary team of exercise researchers, practitioners, scientists, nurses, surgeons, and dietitians from multiple nations.

This investigation had some limitations. We did not conduct a full-scale survey of bariatric exercise professionals across the world, which should be done as a next step. The expert group was a convenience sample, with the implication that there is likely some bias in the analysis. Lastly, a majority of studies provided insufficient reporting of exercise-related tasks. The notable exceptions of this were from a group in Spain (117, 128) and the USA (108). However, we aimed to compensate for this by including as many studies as possible on the topic. Furthermore, we contacted numerous authors of the included publications, and their responses are included in these data.

The results of this study have important clinical implications. First, these models will provide a clearer understanding of the role the exercise professional in the bariatric surgery setting provides and the value they bring to a multidisciplinary surgery team, including nurses (125, 129, 130). More practically, findings provide practical and useful information that could contribute in four major areas: 1) describing the roles and responsibilities exercise professionals are able to fill, helping create job descriptions, 2) developing CPT/billing codes for reimbursement (aligning with how cardiac rehab was developed), helping to spur other funding for positions, 3) credentialing exercise professionals in bariatric care and development of "core competencies" (119) and 4) helping to coordinate care of clinical exercise personnel, perhaps in a system of ExerciseCare. Future needs assessment include: 1) PA guidelines for bariatric patients, perhaps similar to those from Exercise and Sports Science Australia (3) or those recently established for type 2 diabetes (131) and 2) better reporting of roles and tasks performed by the exercise professional in surgery, as outlined by the CERT guidelines (117, 128). Future work should also describe: 1) important



knowledge, skills and competencies, and 2) how exercise professionals collaborate as a member of the multidisciplinary team commonly comprised of nurses, dietitians, psychologists and other providers. More studies are needed to describe the translation and implementation of bariatric and medical weight management PA programs for standardization, reproducibility and to strengthen the case for the role of the exercise professional in bariatric surgery, medical weight loss, and even the greater realm of healthcare and exercise-care.

## CONCLUSION

To our knowledge, this is the first study to systematically investigate the role of the exercise professional in a bariatric surgery setting. Exercise is regarded as an important facet of surgery multidisciplinary care, but has been poorly implemented, and many programs do not have an exercise professional within their team. It is also important to note that patients want access to exercise professionals before and after their surgery (132), underpinning why we completed the first systematic and multimethod investigation of the exercise professional in bariatric surgery. We searched for and analyzed every published bariatric exercise program from inception to 2022. Our expert group of bariatric exercise professionals, allied clinicians, and scientists reached a consensus on 7 major classifications of job tasks for the exercise professional. Tasks varied marginally by the title of the exercise professional. Results from our study provide convergent validity with other exercise professional credentialing bodies. It is important for governing medical associations across the world to formally recognize experienced exercise professionals as playing pivotal roles in continuing, multidisciplinary care for bariatric surgery patients. Data from this rigorous and unique analysis can also provide evidence-based guidance on how to solidify these positions within the greater context of healthcare.

## ACKNOWLEDGEMENTS

The authors wish to thank Jessie Moore, R.N., A.P.R.N. (Yale New Haven Hospital), Jennifer Guan, D.P.T., Edd Taylor, Ph.D. (University of Colorado) and Amanda Divin, Ph.D. (Texas A&M University - Commerce) for thoughtful critiques and technical assistance. Rebecca Lamberti, R.N., B.S.N., M.S.N., D.N.P. (Yale New Haven Hospital) and Diana Rivera, R.N., B.S.N., C.N.M.L. (Yale New Haven Hospital) provided strategic administrative and logistical support.

## COMPETING INTERESTS

None

## AUTHOR CONTRIBUTIONS

The concept was developed by MSK, DB, SG, and BG. MSK, DB, LR and LH formed the Core Group. The Expert Group and advisory panel consisted of MSK, LR, JH, CEG, MD, EB, BM, AD, DB, LH, BG, ERM, GA, JM, OA, SW and SG. The literature review was conducted by MSK. Data extraction was conducted by MSK, MD, OA, and SW. CA conducted the statistical modelling. Statistical consulting was provided by MH. MSK, DB, BG, LR, and LH wrote the manuscript. SB created the artwork. OA provided additional illustration support. NBH was the study auditor. All authors read and critiqued the paper and provided final approval of the manuscript.

## FUNDING

Bruno Gualano is supported by FAPESP, CNPq and CAPES. LH is supported by the National Institute for Health and Care Research (NIHR) - Leicester Biomedical Research Centre (BRC). [The views expressed are those of the author(s) and not necessarily those of the NIHR or the Department of Health and Social Care.] GA was supported by a fellowship from the Office of Academic Affiliations at the United States Veterans Health Administration, a Robert E. Leet and Clara Guthrie Patterson Trust Mentored Research Award, Bank of America, N.A., Trustee, and American Heart Association Grant #852679 (GA, 2021–2024).

## DATA AVAILABILITY STATEMENT

All data produced in the present study are available upon reasonable request to the authors.

## REFERENCES

1. Grover BT, Morell MC, Kothari SN, Borgert AJ, Kallies KJ, Baker MT. Defining Weight Loss After Bariatric Surgery: a Call for Standardization. *Obesity Surgery*. 2019;29(11):3493-9. doi: 10.1007/s11695-019-04022-z
2. Garber CE. The Health Benefits of Exercise in Overweight and Obese Patients. *Curr Sports Med Rep*. 2019;18(8):287-91. doi: 10.1249/jsr.0000000000000619
3. Johnson NA, Sultana RN, Brown WJ, Bauman AE, Gill T. Physical activity in the management of obesity in adults: A position statement from Exercise and Sport Science Australia. *Journal of Science and Medicine in Sport*. 2021;24(12):1245-54. doi: <https://doi.org/10.1016/j.jsams.2021.07.009>
4. Herring LY, Stevinson C, Carter P, Biddle SJH, Bowrey D, Sutton C, et al. The effects of supervised exercise training 12-24 months after bariatric surgery on physical function and body composition: a randomised controlled trial. *Int J Obes (Lond)*. 2017;41(6):909-16. doi: 10.1038/ijo.2017.60
5. Bond DS, Manuel KM, Wu Y, Livingston J, Papasavas PK, Baillot A, et al. Exercise for counteracting weight recurrence after bariatric surgery: a systematic review and meta-analysis of randomized controlled trials. *Surgery for Obesity and Related Diseases*. 2022. doi: <https://doi.org/10.1016/j.soard.2022.12.029>
6. Zabatiero J, Smith A, Gucciardi DF, Hamdorf AM, Taylor SF, Hill K. Patterns of Change in Device-Based Physical Activity and Sedentary Time Following Bariatric Surgery: a Longitudinal Observational Study. *Obesity Surgery*. 2021;31(7):3015-25. doi: 10.1007/s11695-021-05337-6
7. Dantas WS, Roschel H, Murai IH, Gil S, Davuluri G, Axelrod CL, et al. Exercise-Induced Increases in Insulin Sensitivity After Bariatric Surgery Are Mediated By Muscle Extracellular Matrix Remodeling. *Diabetes*. 2020;69(8):1675-91. doi: 10.2337/db19-1180
8. Dantas WS, Gil S, Murai IH, Costa-Hong V, Peçanha T, Merege-Filho CAA, et al. Reversal of Improved Endothelial Function After Bariatric Surgery Is Mitigated by Exercise Training. *Journal of the American College of Cardiology*. 2018;72(18):2278-9. doi: 10.1016/j.jacc.2018.07.094
9. Gualano B, Kirwan JP, Roschel H. Exercise Is Key to Sustaining Metabolic Gains After Bariatric Surgery. *Exerc Sport Sci Rev*. 2021;49(3):197-204. doi: 10.1249/jes.0000000000000253
10. Herring L, Stevinson C, Carter P, Biddle S, Bowrey D, Sutton C, et al. The effects of supervised exercise training 12-24 months after bariatric surgery on physical function and body

- composition: a randomised controlled trial. *International Journal of Obesity*. 2017;41:909-16. doi:
11. Martin-Fernandez KW, Creel DB, Schuh LM. Psychosocial and behavioral correlates of weight loss 12 to 15 years after bariatric surgery. *Journal of Behavioral Medicine*. 2022;45(2):252-9. doi: 10.1007/s10865-021-00263-5
12. Yang K, Zhou Y, Wang M, Shen M, Zhang X, Wang Y. Status of the Field of Bariatric Surgery: a National Survey of China in 2018. *Obesity Surgery*. 2019;29(6):1911-21. doi: 10.1007/s11695-019-03792-w
13. Duijzer G, Haveman-Nies A, Jansen SC, ter Beek J, Hiddink GJ, Feskens EJM. Feasibility and potential impact of the adapted SLIM diabetes prevention intervention in a Dutch real-life setting: The SLIMMER pilot study. *Patient Education and Counseling*. 2014;97(1):101-7. doi: <https://doi.org/10.1016/j.pec.2014.05.024>
14. Aziz Z, Absetz P, Oldroyd J, Pronk NP, Oldenburg B. A systematic review of real-world diabetes prevention programs: learnings from the last 15 years. *Implementation Science*. 2015;10(1):172. doi: 10.1186/s13012-015-0354-6
15. Hansen D, Decroix L, Devos Y, Nocca D, Cornelissen V, Dillemans B, et al. Towards Optimized Care After Bariatric Surgery by Physical Activity and Exercise Intervention: a Review. *Obesity Surgery*. 2020;30(3):1118-25. doi: 10.1007/s11695-020-04390-x
16. Kalarchian MA, Marcus MD, Courcoulas AP, Cheng Y, Levine MD. Preoperative lifestyle intervention in bariatric surgery: initial results from a randomized, controlled trial. *Obesity (Silver Spring)*. 2013;21(2):254-60. doi: 10.1002/oby.20069
17. Koorts H, Eakin E, Estabrooks P, Timperio A, Salmon J, Bauman A. Implementation and scale up of population physical activity interventions for clinical and community settings: the PRACTIS guide. *International Journal of Behavioral Nutrition and Physical Activity*. 2018;15(1):51. doi: 10.1186/s12966-018-0678-0
18. Jansen SC, Haveman-Nies A, Duijzer G, Ter Beek J, Hiddink GJ, Feskens EJM. Adapting the SLIM diabetes prevention intervention to a Dutch real-life setting: joint decision making by science and practice. *BMC Public Health*. 2013;13(1):457. doi: 10.1186/1471-2458-13-457
19. van Dongen EJ, Leerlooijer JN, Steijns JM, Tieland M, de Groot LC, Haveman-Nies A. Translation of a tailored nutrition and resistance exercise intervention for elderly people to a real-life setting: adaptation process and pilot study. *BMC Geriatr*. 2017;17(1):25. doi: 10.1186/s12877-017-0413-8
20. Laddu D, Ma J, Kaar J, Ozemek C, Durant RW, Campbell T, et al. Health Behavior Change Programs in Primary Care and Community Practices for Cardiovascular Disease Prevention and Risk Factor Management Among Midlife and Older Adults: A Scientific Statement From the American Heart Association. *Circulation*. 2021;144(24):e533-e49. doi: 10.1161/CIR.0000000000001026
21. McElwaine KM, Freund M, Campbell EM, Bartlem KM, Wye PM, Wiggers JH. Systematic review of interventions to increase the delivery of preventive care by primary care nurses and allied health clinicians. *Implement Sci*. 2016;11:50. doi: 10.1186/s13012-016-0409-3
22. Estabrooks PA, Glasgow RE. Translating Effective Clinic-Based Physical Activity Interventions into Practice. *American Journal of Preventive Medicine*. 2006;31(4, Supplement):45-56. doi: <https://doi.org/10.1016/j.amepre.2006.06.019>
23. Clark RE, McArthur C, Papaioannou A, Cheung AM, Laprade J, Lee L, et al. "I do not have time. Is there a handout I can use?": combining physicians' needs and behavior change theory to put physical activity evidence into practice. *Osteoporos Int*. 2017;28(6):1953-63. doi: 10.1007/s00198-017-3975-6
24. Hanapi NHM, Yuliawiratman BS, Lai LL, Halil H, Koo JG, Suhaimi A. Optimising the Bariatric Patients' Outcome through Cardiac Rehabilitation Approach. *Obesity Surgery*. 2018;28(7):2130-4. doi: 10.1007/s11695-018-3256-2



25. Gallo PM. The United States Registry for Exercise Professionals: How it Works and Ways it Can Advance the Fitness Profession. ACSMS Health Fit J. 2023;27(2):51-3. doi: 10.1249/fit.0000000000000843
26. Slade SC, Dionne CE, Underwood M, Buchbinder R. Consensus on Exercise Reporting Template (CERT): Explanation and Elaboration Statement. Br J Sports Med. 2016;50(23):1428-37. doi: 10.1136/bjsports-2016-096651
27. Villa-González E, Barranco-Ruiz Y, Rodríguez-Pérez MA, Carretero-Ruiz A, García-Martínez JM, Hernández-Martínez A, et al. Supervised exercise following bariatric surgery in morbid obese adults: CERT-based exercise study protocol of the EFIBAR randomised controlled trial. BMC Surgery. 2019;19(1):127. doi: 10.1186/s12893-019-0566-9
28. AGREE Collaboration. Development and validation of an international appraisal instrument for assessing the quality of clinical practice guidelines: the AGREE project. Qual Saf Health Care. 2003;12(1):18-23. doi: 10.1136/qhc.12.1.18
29. Hsieh H-F, Shannon SE. Three approaches to qualitative content analysis. Qualitative health research. 2005;15(9):1277-88. doi: 10.1177/1049732305276687
30. Righi C, James J, Beasley M, Day DL, Fox JE, Gieber J, et al. Card sort analysis best practices. J Usability Studies. 2013;8(3):69–89. doi: 10.1136/qhc.12.1.18
31. Rokach L, Maimon O. Clustering Methods. In: Maimon O, Rokach L, editors. Data Mining and Knowledge Discovery Handbook. Boston, MA: Springer US; 2005. p. 321-52.
32. Rauch W. The decision Delphi. Technological Forecasting and Social Change. 1979;15(3):159-69. doi: [https://doi.org/10.1016/0040-1625\(79\)90011-8](https://doi.org/10.1016/0040-1625(79)90011-8)
33. Jamnik VK, Warburton DE, Makarski J, McKenzie DC, Shephard RJ, Stone JA, et al. Enhancing the effectiveness of clearance for physical activity participation: background and overall process. Appl Physiol Nutr Metab. 2011;36 Suppl 1:S3-13. doi: 10.1139/h11-044
34. Page MJ, McKenzie JE, Bossuyt PM, Boutron I, Hoffmann TC, Mulrow CD, et al. Updating guidance for reporting systematic reviews: development of the PRISMA 2020 statement. Journal of Clinical Epidemiology. 2021;134:103-12. doi: <https://doi.org/10.1016/j.jclinepi.2021.02.003>
35. American Physical Therapy Association. About Physical Therapists and Physical Therapist Assistants 2023 [Available from: <https://www.choosept.com/why-physical-therapy/about-physical-therapists-and-physical-therapist-assistants>].
36. American College of Sports Medicine. ACSM Certified Exercise Physiologist: Exam Content Outline 2023 [Available from: [https://www.acsm.org/docs/default-source/certification-documents/acsmep\\_examcontentoutline\\_2020.pdf?sfvrsn=d413f75\\_16](https://www.acsm.org/docs/default-source/certification-documents/acsmep_examcontentoutline_2020.pdf?sfvrsn=d413f75_16)].
37. Froment FP, Olson KA, Hooper TL, Shaffer SM, Sizer PS, Woodhouse LJ, et al. Large variability found in musculoskeletal physiotherapy scope of practice throughout WCPT and IFOMPT affiliated countries: An international survey. Musculoskeletal Science and Practice. 2019;42:104-19. doi: <https://doi.org/10.1016/j.msksp.2019.04.012>
38. World Confederation for Physical Therapy. Description of physical therapy: Policy statement. 2019.
39. Heimerl F, Lohmann S, Lange S, Ertl T. Word Cloud Explorer: Text Analytics Based on Word Clouds. Proceedings of the 2014 47th Hawaii International Conference on System Sciences: IEEE Computer Society; 2014. p. 1833–42. doi: 10.1109/hicss.2014.231
40. Zagarins SE, Allen NA, Skinner SS, Kemper AJ, Welch G. Improved exercise behaviors associated with a comprehensive structured exercise program following bariatric surgery. Bariatric Nursing and Surgical Patient Care. 2011;6(2):85-90. doi: 10.1089/bar.2011.9971
41. Woodlief TL, Carnero EA, Standley RA, Distefano G, Anthony SJ, Dubis GS, et al. Dose response of exercise training following roux-en-Y gastric bypass surgery: A randomized trial. Obesity (Silver Spring). 2015;23(12):2454-61. doi: 10.1002/oby.21332

- 691 42. Wiklund M, Sundqvist E, Olsén MF. Physical Activity in the Immediate Postoperative  
692 Phase in Patients Undergoing Roux-en-Y Gastric Bypass-a Randomized Controlled Trial.  
693 Obesity Surgery. 2015;25(12):2245-50. doi: 10.1007/s11695-015-1690-y
- 694 43. Tardif I, Auclair A, Piché M-E, Biertho L, Marceau S, Hould F-S, et al. Impact of a 12-  
695 Week Randomized Exercise Training Program on Lipid Profile in Severely Obese Patients  
696 Following Bariatric Surgery. Obesity Surgery. 2020;30(8):3030-6. doi: 10.1007/s11695-020-  
697 04647-5
- 698 44. Stolberg CR, Mundbjerg LH, Funch-Jensen P, Gram B, Bladbjerg E-M, Juhl CB. Effects  
699 of gastric bypass surgery followed by supervised physical training on inflammation and  
700 endothelial function: A randomized controlled trial. Atherosclerosis. 2018;273:37-44. doi:  
701 10.1016/j.atherosclerosis.2018.04.002
- 702 45. Stolberg CR, Mundbjerg LH, Funch-Jensen P, Gram B, Bladbjerg E-M, Juhl CB. Reply  
703 to: "Replicability of exercise programs following bariatric surgery". Atherosclerosis.  
704 2018;278:332-3. doi: 10.1016/j.atherosclerosis.2018.09.028
- 705 46. Stolberg CR, Mundbjerg LH, Bladbjerg E-M, Funch-Jensen P, Gram B, Juhl CB.  
706 Physical training following gastric bypass: effects on physical activity and quality of life-a  
707 randomized controlled trial. Quality of Life Research. 2018;27(12):3113-22. doi:  
708 10.1007/s11136-018-1938-9
- 709 47. Stegen S, Derave W, Calders P, Laethem CV, Pattyn P. Physical fitness in morbidly  
710 obese patients: effect of gastric bypass surgery and exercise training. Obesity Surgery.  
711 2011;21(1):61-70. doi: 10.1007/s11695-009-0045-y
- 712 48. Soriano-Maldonado A, Martínez-Forte S, Ferrer-Márquez M, Martínez-Rosales E,  
713 Hernández-Martínez A, Carretero-Ruiz A, et al. Physical Exercise following bariatric surgery in  
714 women with Morbid obesity. Medicine (Baltimore). 2020;99(12). doi:  
715 10.1097/MD.00000000000019427
- 716 49. Silva TLTBd, Fontes MT, Mariano RD, Mota MM. Effects of the program of supervised  
717 exercise on body composition after bariatric surgery: case report. Revista Brasileira de  
718 Obesidade, Nutrição e Emagrecimento. 2015;9(52). doi:
- 719 50. Shah M, Snell PG, Rao S, Adams-Huet B, Quittner C, Livingston EH, et al. High-volume  
720 exercise program in obese bariatric surgery patients: a randomized, controlled trial. Obesity  
721 (Silver Spring). 2011;19(9):1826-34. doi: 10.1038/oby.2011.172
- 722 51. Rothwell L, Lilian Kow JT. Effect of a post-operative structured exercise programme on  
723 short-term weight loss after obesity surgery using adjustable gastric bands. Obesity Surgery.  
724 2015;25(1):126-8. doi: 10.1007/s11695-014-1323-x
- 725 52. Rojhani-Shirazi Z, Mansoriyan SA, Hosseini SV. The effect of balance training on clinical  
726 balance performance in obese patients aged 20–50 years old undergoing sleeve gastrectomy.  
727 European Surgery. 2016;48:105-9. doi: 10.1007/s10353-015-0379-8
- 728 53. Ricci PA, Thommazo-Luporini LD, Jürgensen SP, André LD, Haddad GF, Arena R, et al.  
729 Effects of Whole-Body Electromyostimulation Associated with Dynamic Exercise on Functional  
730 Capacity and Heart Rate Variability After Bariatric Surgery: a Randomized, Double-Blind, and  
731 Sham-Controlled Trial. Obesity Surgery. 2020;30(10):3862-71. doi: 10.1007/s11695-020-04724-  
732 9
- 733 54. Proulx É, Auclair A, Piché M-E, Harvey J, Pettigrew M, Biertho L, et al. Safety of Blood  
734 Glucose Response Following Exercise Training After Bariatric Surgery. Obesity Surgery.  
735 2018;28(12):3976-83. doi: 10.1007/s11695-018-3449-8
- 736 55. Powell SM, Fasczewski KS, Gill DL, Davis PG. Go with the FLOW: Implementation of a  
737 psychological skills intervention in an exercise program for post-bariatric surgery patients.  
738 Journal of Health Psychology. 2020;25(13-14):2260-71. doi: 10.1177/1359105318793182
- 739 56. Powell SM, Fasczewski KS, Gill DL, Davis PG. Go with the FLOW: Implementation of a  
740 psychological skills intervention in an exercise program for post-bariatric surgery patients.  
741 Journal of Health Psychology. 2018:1-12. doi: 10.1177/1359105318793182

57. Picó-Sirvent I, Aracil-Marco A, Pastor D, Moya-Ramón M. Effects of a Combined High-Intensity Interval Training and Resistance Training Program in Patients Awaiting Bariatric Surgery: A Pilot Study. *Sports (Basel)*. 2019;7(3):72. doi: 10.3390/sports7030072
58. Parikh M, Dasari M, McMacken M, Ren C, Fielding G, Ogedegbe G. Does a preoperative medically supervised weight loss program improve bariatric surgery outcomes? A pilot randomized study. *Surgical Endoscopy*. 2012;26:853-61. doi: 10.1007/s00464-011-1966-9
59. Onofre T, Carlos R, Oliver N, Felismino A, Fialho D, Corte R, et al. Effects of a Physical Activity Program on Cardiorespiratory Fitness and Pulmonary Function in Obese Women after Bariatric Surgery: a Pilot Study. *Obesity Surgery*. 2017;27(8):2026-33. doi: 10.1007/s11695-017-2584-y
60. Oliveira JJd, Freitas ACTd, Almeida AAd. Postoperative effect of physical therapy related to functional capacity and respiratory muscle strength in patients submitted to bariatric surgery. *Arquiox Brasileios de Cirurgia Digestiva*. 2016;28:43-7. doi: 10.1590/0102-6720201600S10012
61. Ng DP, McClements KE, Yeo A, Chen X, Png EK, Ng C. Efficacy of supervised exercise training in patients post bariatric surgery. *Physiotherapy*. 2015;101:E1083-E4. doi: <https://doi.org/10.1016/j.physio.2015.03.1973>
62. Muschitz C, Kocijan R, Haschka J, Zendeli A, Pirker T, Geiger C, et al. The Impact of Vitamin D, Calcium, Protein Supplementation, and Physical Exercise on Bone Metabolism After Bariatric Surgery: The BABS Study. *Journal of Bone and Mineral Research*. 2016;31(3):672-82. doi: 10.1002/jbmr.2707
63. Mundbjerg LH, Stolberg CR, Cecere S, Bladbjerg E-M, Funch-Jensen P, Gram B, et al. Supervised Physical Training Improves Weight Loss After Roux-en-Y Gastric Bypass Surgery: A Randomized Controlled Trial. *Obesity (Silver Spring)*. 2018;26(5):828-37. doi: 10.1002/oby.22143
64. Mundbjerg LH, Stolberg CR, Bladbjerg E-M, Funch-Jensen P, Juhl CB, Gram B. Effects of 6 months supervised physical training on muscle strength and aerobic capacity in patients undergoing Roux-en-Y gastric bypass surgery: a randomized controlled trial. *Clinical Obesity*. 2018;8(4):227-35. doi: 10.1111/cob.12256
65. Morana C, Collignon M, Nocca D. Effectiveness of a Functional Rehabilitation Program After Bariatric Surgery: a Pilot Study. *Obesity Surgery*. 2018;28(8):2321-6. doi: 10.1007/s11695-018-3154-7
66. Marcon ER, Gus I, Neumann CR. Impact of a minimum program of supervised exercises in the cardiometabolic risk in patients with morbid obesity. *Arquiox Brasileios de Endocrinologia e Metabologia*. 2011;55(5):331-8. doi: 10.1590/s0004-27302011000500006
67. Marcon ER, Baglioni S, Bittencourt L, Lopes CLN, Neumann CR, Trindade MRM. What Is the Best Treatment before Bariatric Surgery? Exercise, Exercise and Group Therapy, or Conventional Waiting: a Randomized Controlled Trial. *Obesity Surgery*. 2017;27:763-73. doi: 10.1007/s11695-016-2365-z
68. Marchesi F, Sario GD, Reggiani V, Tartamella F, Giammaresi A, Cecchini S, et al. Road Running After Gastric Bypass for Morbid Obesity: Rationale and Results of a New Protocol. *Obesity Surgery*. 2015;25(7):1162-70. doi: 10.1007/s11695-014-1517-2
69. Marc-Hernández A, Ruiz-Tovar J, Aracil A, Guillén S, Moya-Ramón M. Impact of Exercise on Body Composition and Cardiometabolic Risk Factors in Patients Awaiting Bariatric Surgery. *Obesity Surgery*. 2019;29(12):3891-900. doi: 10.1007/s11695-019-04088-9
70. Lopez YON, Coen PM, GoodpasteR BH, Seyhan AA. Gastric bypass surgery with exercise alters plasma microRNAs that predict improvements in cardiometabolic risk. *International Journal of Obesity*. 2017;41(7):1121-30. doi: 10.1038/ijo.2017.84
71. Klasnja P, Rosenberg DE, Zhou J, Anau J, Gupta A, Arterburn DE. A quality-improvement optimization pilot of BariFit, a mobile health intervention to promote physical

- activity after bariatric surgery. Translational Behavioral Medicine. 2020;1-10. doi: 10.1093/tbm/ibaa040
72. Kerrigan DJ, Loduca-Duhaime A, Carlin AM, Szymanski W, Genaw J. A trans-disciplinary approach to weight loss in the super super morbidly obese. Journal of Clinical Exercise Physiology. 2012;1(1):30-4. doi: <https://doi.org/10.31189/2165-6193-1.1.30>
73. Kelley W. Medically integrated exercise: Florida hospital celebration health bariatric program. ACSM's Health & Fitness Journal. 2006;10(6):28-30. doi: 10.1007/s11695-020-04489-1.
74. Jiménez-Loaisa A, González-Cutre D, Beltrán-Carrillo VJ, Alcaraz-Ibáñez M. Changes in Bariatric Patients' Physical Activity Levels and Health-Related Quality of Life Following a Postoperative Motivational Physical Activity Intervention. Obesity Surgery. 2020;30(6):2302-12. doi: 10.1007/s11695-020-04489-1.
75. Jassil FC, Manning S, Lewis N, Steinmo S, Kingett H, Lough F, et al. Feasibility and Impact of a Combined Supervised Exercise and Nutritional-Behavioral Intervention following Bariatric Surgery: A Pilot Study. Journal of Obesity. 2015;2015:12. doi: <https://doi.org/10.1155/2015/693829>
76. Huck CJ. Effects of supervised resistance training on fitness and functional strength in patients succeeding bariatric surgery. Journal of Strength and Conditioning Research. 2015;29(3):589-95. doi: 10.1519/JSC.0000000000000667
77. Hickey MS, Gavigan KE, McCammon MR, Tyndhall GL, Pories WJ, Israel RG, et al. Effects of 7 days of exercise training on insulin action in morbidly obese men. Clinical Exercise Physiology. 1999;1(1):24-8.
78. Hassannejad A, Khalaj A, Mansournia MA, Tabesh MR, Alizadeh Z. The Effect of Aerobic or Aerobic-Strength Exercise on Body Composition and Functional Capacity in Patients with BMI  $\geq 35$  after Bariatric Surgery: a Randomized Control Trial. Obesity Surgery. 2017;27(11):2792-801. doi: 10.1007/s11695-017-2717-3
79. Hanvold SE, Vinknes KJ, Løken EB, Hjartaker A, Klungsøyr O, Birkeland E, et al. Does Lifestyle Intervention After Gastric Bypass Surgery Prevent Weight Regain? A Randomized Clinical Trial. Obesity Surgery. 2019;29(11). doi: 10.1007/s11695-019-04109-7
80. Hamdy O, Ashrafzadeh S, Mottalib A. Weight Management in Patients with Type 2 Diabetes: a Multidisciplinary Real-world Approach. Current Diabetes Reports. 2018;18(9). doi: 10.1007/s11892-018-1030-4
81. Halperin F, Ding S-A, Simonson DC, Panosian J, Goebel-Fabbri A, Wewalka M, et al. Roux-en-Y gastric bypass surgery or lifestyle with intensive medical management in patients with type 2 diabetes: feasibility and 1-year results of a randomized clinical trial. JAMA Surgery. 2014;149(7):716-26. doi: 10.1001/jamasurg.2014.514
82. Gonzalez-Cutre D, Jimenez-Loaisa A, Romero-Elias M, Beltran-Carrillo VJ. Exploring bariatric patients' need for novelty in a motivational physical activity program: a qualitative study. European Journal of Human Movement. 2019;43:1-12.
83. Gill DL, Fasczewski KS, Reifsteck EJ, Rothberger SM, Davis PG. Evaluation of an exercise programme for post-bariatric surgery patients: views of participants. Obesity Science & Practice. 2018;4(3):259-67. doi: 10.1002/osp4.165
84. Funderburk JA, Callis S. Aquatic intervention effect on the quality of life prior to obesity surgery: a pilot study. Annual in Therapeutic Recreation; 2010.
85. Egberts KJ, Brown W, O'Brien PE. Optimising lifestyle factors to achieve weight loss in surgical patients. Obesity Research & Clinical Practice. 2010;4:S13. doi: <https://doi.org/10.1016/j.orcp.2010.09.026>
86. Egberts K, Brown W, O'Brien P. Optimising lifestyle factors to achieve weight loss in surgical patients. Surgery for Obesity and Related Diseases. 2011;7:368. doi: 10.1016/j.orcp.2010.09.026
87. Daniels P, Burns RD, Brusseau TA, Hall MS, Davidson L, Adams TD, et al. Effect of a randomised 12-week resistance training programme on muscular strength, cross-sectional area



- 843 and muscle quality in women having undergone Roux-en-Y gastric bypass. *Journal of Sports*  
844 *Sciences*. 2018;36(5):529-35. doi: 10.1080/02640414.2017.1322217
- 845 88. Creel DB, Schuh LM, Reed CA, Gomez AR, Hurst LA, Stote J, et al. A randomized trial  
846 comparing two interventions to increase physical activity among patients undergoing bariatric  
847 surgery. *Obesity (Silver Spring)*. 2016;24(8):1660-8. doi: 0.1002/oby.21548
- 848 89. Coen PM, Tanner CJ, Helblin NL, Dubis GS, Hames KC, Xie H, et al. Clinical trial  
849 demonstrates exercise following bariatric surgery improves insulin sensitivity. *Journal of Clinical*  
850 *Investigation*. 2015;125(1):248-57. doi: 10.1172/JCI78016
- 851 90. Coen PM, Menshikova EV, Distefano G, Zheng D, Tanner CJ, Standley RA, et al.  
852 Exercise and Weight Loss Improve Muscle Mitochondrial Respiration, Lipid Partitioning, and  
853 Insulin Sensitivity After Gastric Bypass Surgery. *Diabetes*. 2015;64(11):3737-50. doi:  
854 10.2337/db15-0809
- 855 91. Castello-Simões V, Simões RP, Beltrame T, Bassi D, Catai AM, Arena R, et al. Effects  
856 of aerobic exercise training on variability and heart rate kinetic during submaximal exercise after  
857 gastric bypass surgery – a randomized controlled trial. *Disability and Rehabilitation*.  
858 2013;35(4):334-42. doi: 10.3109/09638288.2012.694575
- 859 92. Castello V, Simões RP, Bassi D, Catai AM, Arena R, Borghi-Silva A. Impact of aerobic  
860 exercise training on heart rate variability and functional capacity in obese women after gastric  
861 bypass surgery. *Obesity Surgery*. 2011;21(11):1739-49. doi: 10.1007/s11695-010-0319-4
- 862 93. Carnero EA, Dubis GS, Hames KC, Jakicic JM, Houmard JA, Coen PM, et al.  
863 Randomized trial reveals that physical activity and energy expenditure are associated with  
864 weight and body composition after RYGB. *Obesity (Silver Spring)*. 2017;25(7):1206-16. doi:  
865 10.1002/oby.21864
- 866 94. Campanha-Versiani L, Pereira DAG, Ribeiro-Samora GA, Ramos AV, Diniz MFHdS,  
867 Marco LAD, et al. The Effect of a Muscle Weight-Bearing and Aerobic Exercise Program on the  
868 Body Composition, Muscular Strength, Biochemical Markers, and Bone Mass of Obese Patients  
869 Who Have Undergone Gastric Bypass Surgery. *Obesity Surgery*. 2017;27(8):2129-37. doi:  
870 10.1007/s11695-017-2618-5
- 871 95. Brown WA, Burton PR, Shaw K, Smith B, Maffescioni S, Comitti B, et al. A Pre-Hospital  
872 Patient Education Program Improves Outcomes of Bariatric Surgery. *Obesity Surgery*.  
873 2016;26(9):2074-81. doi: 10.1007/s11695-016-2075-6
- 874 96. Brandenburg D, Kotlowski R. Practice makes perfect? Patient response to a prebariatric  
875 surgery behavior modification program. *Obesity Surgery*. 2005;15(1):125-32. doi:  
876 10.1381/0960892052993594
- 877 97. Bond DS, Vithiananthan S, Thomas JG, Trautvetter J, Unick JL, Jakicic JM, et al. Bari-  
878 Active: a randomized controlled trial of a preoperative intervention to increase physical activity in  
879 bariatric surgery patients. *Surgery for Obesity and Related Diseases*. 2015;11(1):169-77. doi:  
880 10.1016/j.soard.2014.07.010
- 881 98. Bond DS, Thomas JG, King WC, Vithiananthan S, Trautvetter J, Unick JL, et al. Exercise  
882 improves quality of life in bariatric surgery candidates: results from the Bari-Active trial. *Obesity*  
883 *Journal*. 2015;23(3):536-42. doi: 10.1002/oby.20988
- 884 99. Bond D, Thomas J, Vithiananthan S, Unick J, Webster J, Roye G, et al. Intervention-  
885 related increases in preoperative physical activity are maintained 6-months after Bariatric  
886 surgery: results from the bari-active trial. *International Journal of Obesity*. 2017;41:467-70. doi:  
887 10.1038/ijo.2016.237
- 888 100. Berggren JR, Boyle KE, Chapman WH, Houmard JA. Skeletal muscle lipid oxidation and  
889 obesity: influence of weight loss and exercise. *Am J Physiol Endocrinol Metab*. 2008(294):E726-  
890 E32. doi: 10.1152/ajpendo.00354.2007
- 891 101. Baillot A, Vallée C-A, Mampuya WM, Dionne IJ, Comeau E, Méziat-Burdin A, et al.  
892 Effects of a Pre-surgery Supervised Exercise Training 1 Year After Bariatric Surgery: a

Randomized Controlled Study. *Obesity Surgery*. 2018;28(4):955-62. doi: 10.1007/s11695-017-2943-8

102. Baillot A, Mampuya WM, Dionne SJ, Comeau E, Méziat-Burdin A, Langlois M-F. Impacts of Supervised Exercise Training in Addition to Interdisciplinary Lifestyle Management in Subjects Awaiting Bariatric Surgery: a Randomized Controlled Study. *Obesity Surgery*. 2016;26(11):2602-10. doi: 10.1007/s11695-016-2153-9

103. Baillot A, Mampuya WM, Comeau E, Méziat-Burdin A, Langlois MF. Feasibility and impacts of supervised exercise training in subjects with obesity awaiting bariatric surgery: a pilot study. *Obesity Surgery*. 2013;23(7):882-91. doi: 10.1007/s11695-013-0875-5

104. Baillot A, Boissy P, Tousignant M, Langlois M-F. Feasibility and effect of in-home physical exercise training delivered via telehealth before bariatric surgery. *Journal of Telemedicine and Telecare*. 2016;23(5):529-35. doi: 10.1177/1357633X16653511

105. Audrey Auclair, Harvey J, Leclerc J, Pich M-E, Kim O'Connor M, Nadreau É, et al. Determinants of Cardiorespiratory Fitness After Bariatric Surgery: Insights From a Randomised Controlled Trial of a Supervised Training Program. *Canadian Journal of Cardiology*. 2020;37(2):251-9. doi: 10.1016/j.cjca.2020.03.032

106. Coleman KJ, Caparosa SL, Nichols JF, Fujioka K, Koebnick C, McCloskey KN, et al. Understanding the Capacity for Exercise in Post-Bariatric Patients. *Obesity Surgery*. 2017;27(1):51-8. doi: 10.1007/s11695-016-2240-y

107. Gilbertson NM, Gaitán JM, Osinski V, Rexrode EA, Garmey JC, Mehaffey JH, et al. Pre-operative aerobic exercise on metabolic health and surgical outcomes in patients receiving bariatric surgery: A pilot trial. *PLoS One*. 2020;15(10). doi: 10.1371/journal.pone.0239130

108. Panosian J, Ding S-A, Wewalka M, Simonson DC, Goebel-Fabbri A, Foster K, et al. Physical activity in obese type 2 diabetes after gastric bypass or medical management. *The American Journal of Medicine*. 2017;130(1):83-92. doi: 10.1016/j.amjmed.2016.07.019

109. Lemieux-Simard C, Pettigrew M, Auclair A, Piche ME, Biertho L, Marceau S, et al. Impact of a 12-week supervised exercise program on weight loss trajectory, daily physical activity levels and sedentary behaviors after bariatric surgery. *European Heart Journal*. 2021;42. doi: 10.1093/eurheartj/ehab724.2605

110. Pettigrew M, Auclair A, Harvey J, Marceau S, Biertho L, Poirier P. Daily physical activity level after bariatric surgery and a 12-week supervised exercise program: Are they active enough? *Canadian Journal of Cardiology*. 2019;35(10).

111. Brun J-F, Lasteyrie V, Hammoudi L, Nocca D, Ghanassia E, Noirez P, et al. Exercise targeted at the level of maximal lipid oxidation (LIPOXmax) improves weight loss, decreases orexigenic pulsions and increases satiety after sleeve gastrectomy. *Global Journal of Obesity, Diabetes and Metabolic Syndrome*. 2019;6(2):17-21. doi: 10.17352/2455-8583.000037

112. Gil S, Kirwan JP, Murai IH, Dantas WS, Merege-Filho CAA, Ghosh S, et al. A randomized clinical trial on the effects of exercise on muscle remodelling following bariatric surgery. *Journal of Cachexia, Sarcopenia, and Muscle*. 2021;12(6):1440-55. doi: 10.1002/jcsm.12815

113. Gil S, Peçanha T, Dantas WS, Murai IH, Merege-Filho CAA, Sá-Pinto ALd, et al. Exercise Enhances the Effect of Bariatric Surgery in Markers of Cardiac Autonomic Function. *Obesity Surgery*. 2021;31(3):1381-6. doi: 10.1007/s11695-020-05053-7

114. Murai IH, Roschel H, Dantas WS, Gil S, Merege-Filho C, Cleva Rd, et al. Exercise Mitigates Bone Loss in Women With Severe Obesity After Roux-en-Y Gastric Bypass: A Randomized Controlled Trial. *Journal of Clinical Endocrinology and Metabolism*. 2019;104(10):4639-50. doi: 10.1210/jc.2019-00074

115. Herrera A, Tabach A, Andaur K, Zamuner A. Effect of physical exercise in bariatric surgery patients: protocol of a randomized controlled clinical trial. *Trials*. 2020;22. doi: <https://doi.org/10.1186/s13063-021-05056-4>



116. Marc-Hernández A, Ruiz-Tovar J, Aracil A, Guillén S, Moya-Ramón M. Effects of a High-Intensity Exercise Program on Weight Regain and Cardio-metabolic Profile after 3 Years of Bariatric Surgery: A Randomized Trial. *Scientific Reports*. 2020;10(1):3123. doi: 10.1038/s41598-020-60044-z
117. Artero EG, Ferrez-Márquez M, Torrente-Sánchez MJ, Martínez-Rosales E, Carretero-Ruiz A, Hernández-Martínez A, et al. Supervised Exercise Immediately After Bariatric Surgery: the Study Protocol of the EFIBAR Randomized Controlled Trial. *Obesity Surgery*. 2021;31(10):4227-35. doi: 10.1007/s11695-021-05559-8
118. Balady GJ, Williams MA, Ades PA, Bittner V, Comoss P, Foody JM, et al. Core components of cardiac rehabilitation/secondary prevention programs: 2007 update: a scientific statement from the American Heart Association Exercise, Cardiac Rehabilitation, and Prevention Committee, the Council on Clinical Cardiology; the Councils on Cardiovascular Nursing, Epidemiology and Prevention, and Nutrition, Physical Activity, and Metabolism; and the American Association of Cardiovascular and Pulmonary Rehabilitation. *Circulation*. 2007;115(20):2675-82. doi: 10.1161/circulationaha.106.180945
119. Hamm LF, Sanderson BK, Ades PA, Berra K, Kaminsky LA, Roitman JL, et al. Core Competencies for Cardiac Rehabilitation/Secondary Prevention Professionals: 2010 Update: Position Statement of the American Association of Cardiovascular and Pulmonary Rehabilitation. *Journal of Cardiopulmonary Rehabilitation and Prevention*. 2011;31(1):2-10. doi: 10.1097/HCR.0b013e318203999d
120. Stults-Kolehmainen MA, Sinha R. The effects of stress on physical activity and exercise. *Sports Medicine*. 2014;44(1):81-121. doi: 10.1007/s40279-013-0090-5
121. Han S, Agostini G, Brewis AA, Wutich A. Avoiding exercise mediates the effects of internalized and experienced weight stigma on physical activity in the years following bariatric surgery. *BMC Obes*. 2018;5:18. doi: 10.1186/s40608-018-0195-3
122. Mechanick JI, Youdim A, Jones DB, Timothy Garvey W, Hurley DL, Molly McMahon M, et al. Clinical Practice Guidelines for the Perioperative Nutritional, Metabolic, and Nonsurgical Support of the Bariatric Surgery Patient—2013 Update: Cosponsored by American Association of Clinical Endocrinologists, The Obesity Society, and American Society for Metabolic & Bariatric Surgery. *Surgery for Obesity and Related Diseases*. 2013;9(2):159-91. doi: <https://doi.org/10.1016/j.soard.2012.12.010>
123. Mechanick JI, Apovian C, Brethauer S, Garvey WT, Joffe AM, Kim J, et al. Clinical practice guidelines for the perioperative nutrition, metabolic, and nonsurgical support of patients undergoing bariatric procedures – 2019 update: cosponsored by American Association of Clinical Endocrinologists/American College of Endocrinology, The Obesity Society, American Society for Metabolic & Bariatric Surgery, Obesity Medicine Association, and American Society of Anesthesiologists. *Surgery for Obesity and Related Diseases*. 2020;16(2):175-247. doi: <https://doi.org/10.1016/j.soard.2019.10.025>
124. Bellicha A, Ciangura C, Poitou C, Portero P, Oppert J-M. Effectiveness of exercise training after bariatric surgery—a systematic literature review and meta-analysis. *Obesity Reviews*. 2018;19(11):1544-56. doi: <https://doi.org/10.1111/obr.12740>
125. American Society for Metabolic and Bariatric Surgery. About the ASMBS Integrated Health Section 2023 [Available from: <https://asmbs.org/integrated-health/about>].
126. Allied Health Professions Australia. Allied Health Professions: Exercise Physiology 2023 [Available from: <https://ahpa.com.au/allied-health-professions/exercise-physiology/>].
127. Smart NA, Williams A, Lyndon K. The Role and Scope of Accredited Exercise Physiologists in the Australian Healthcare System. *Journal of Clinical Exercise Physiology*. 2016;5(2):16-20. doi: 10.31189/2165-6193-5.2.16
128. Villa-González E, Barranco-Ruiz Y, Rodríguez-Pérez MA, Carretero-Ruiz A, García-Martínez JM, Hernández-Martínez A, et al. Supervised exercise following bariatric surgery in

993 morbid obese adults: CERT-based exercise study protocol of the EFIBAR randomised  
994 controlled trial. BMC Surgery. 2019;19(1):127. doi: 10.1186/s12893-019-0566-9  
995 129. Wulkan ML, Walsh SM. The multi-disciplinary approach to adolescent bariatric surgery.  
996 Seminars in Pediatric Surgery. 2014;23(1):2-4. doi:  
997 <https://doi.org/10.1053/j.sempedsurg.2013.10.012>  
998 130. Garneau P, Glazer S, Jackson T, Sampath S, Reed K, Christou N, et al. Guidelines for  
999 Canadian bariatric surgical and medical centres: a statement from the Canadian Association of  
1000 Bariatric Physicians and Surgeons. Can J Surg. 2022;65(2):E170-e7. doi: 10.1503/cjs.020719  
1001 131. Davies MJ, Aroda VR, Collins BS, Gabbay RA, Green J, Maruthur NM, et al.  
1002 Management of Hyperglycemia in Type 2 Diabetes, 2022. A Consensus Report by the American  
1003 Diabetes Association (ADA) and the European Association for the Study of Diabetes (EASD).  
1004 Diabetes Care. 2022;45(11):2753-86. doi: 10.2337/dci22-0034  
1005 132. Tolvanen L, Svensson Å, Hemmingsson E, Christenson A, Lagerros YT. Perceived and  
1006 Preferred Social Support in Patients Experiencing Weight Regain After Bariatric Surgery—a  
1007 Qualitative Study. Obesity Surgery. 2021;31(3):1256-64. doi: 10.1007/s11695-020-05128-5  
1008  
1009

1010

**Table 1A. Details of studies from the USA**

| Studies # * | First author                         | Year                           | Included in data extraction (co-authors MSK and MD) | Study Type               | Study Name  | Country of corresponding author | Setting                      | Program Type                                                                                                                     | Program length      | Mode of exercise training                                   | Patient contact frequency                                         | Exercise professional               | Training/education/credentialing (if noted)   |
|-------------|--------------------------------------|--------------------------------|-----------------------------------------------------|--------------------------|-------------|---------------------------------|------------------------------|----------------------------------------------------------------------------------------------------------------------------------|---------------------|-------------------------------------------------------------|-------------------------------------------------------------------|-------------------------------------|-----------------------------------------------|
| 1           | Berggren                             | 2008                           | X                                                   | Prospective intervention | None        | USA                             | University laboratory        | Supervised exercise training                                                                                                     | 10 consecutive days | Endurance training                                          | Daily                                                             | Masters-level graduate student      | American College of Sports Medicine (ACSM)    |
| 2-4         | Bond; Bond; Bond                     | 2015a; 2015b; 2017             | X                                                   | RCT                      | Bari-Active | USA                             | University hospital, at home | Behavioral intervention, counseling, physical activity tracking                                                                  | 6 weeks             | Home-based walking                                          | 1x/ week (weekly)                                                 | Doctoral-level graduate student     | Master's in physical activity-related studies |
| 5           | Brandenberg                          | 2005                           | X                                                   | Retrospective analysis   | None        | USA                             | University hospital          | Behavioral intervention, supervised liquid supplement diet                                                                       | 6 weeks             | Behavior modification component (non-exercise)              | 1x/ week (weekly)                                                 | Exercise specialist; psychologist   | Not noted                                     |
| 6-10        | Carnero; Coen; Coen; Lopez; Woodlief | 2017; 2015a; 2015b; 2017; 2015 | X                                                   | RCT                      | None        | USA                             | Public hospital; university  | Semi-supervised exercise training                                                                                                | 26 weeks            | Aerobic exercise (stationary cycling or walking)            | 3-5x/ week with at least one directly supervised session per week | Masters-level exercise physiologist | Master's in exercise physiology (EP)          |
| 11          | Coleman                              | 2016                           |                                                     | RCT                      | None        | USA                             | Private hospital, at home    | Supervised exercise training, phone counseling, daily pedometer, reading program curriculum, recording daily physical activities | 26 weeks            | Resistance training, aerobic exercise, flexibility training | 2x / week with 3x/ week of self-directed exercise                 | Not specified                       | Not specified                                 |
| 12          | Creel                                | 2016                           | X                                                   | RCT                      | None        | USA                             | Clinic                       | Exercise counseling with a pedometer                                                                                             | 26 weeks            | Walking                                                     | 3x/ week (2 weekdays and 1 weekend day)                           | Not specified                       | Not specified                                 |
| 13          | Daniels                              | 2018                           | X                                                   | RCT                      | None        | USA                             | University laboratory        | Supervised exercise training                                                                                                     | 12 weeks            | Resistance training                                         | 3x/ week                                                          | Doctoral-level graduate student     | ACSM EP and Certified Personal Trainer (CPT), |

|       |                           |                  |   |                                       |                     |     |                                                                  |                                                                         |                    |                                                                                   |                                                                             |                                                                                                                         |                                                            |
|-------|---------------------------|------------------|---|---------------------------------------|---------------------|-----|------------------------------------------------------------------|-------------------------------------------------------------------------|--------------------|-----------------------------------------------------------------------------------|-----------------------------------------------------------------------------|-------------------------------------------------------------------------------------------------------------------------|------------------------------------------------------------|
|       |                           |                  |   |                                       |                     |     |                                                                  |                                                                         |                    |                                                                                   |                                                                             |                                                                                                                         | NSCA Certified Strength and Conditioning Specialist (CSCS) |
| 14    | Funderburk                | 2010             | X | Quasi-experimental                    | None                | USA | University hospital                                              | Supervised exercise training                                            | 12 weeks           | Aquatic exercise                                                                  | 2x/ week                                                                    | Recreational therapist                                                                                                  | Licensed and nationally certified                          |
| 15    | Gilbertson                | 2020             |   | Pilot study                           | None                | USA | At home                                                          | Unsupervised exercise training with exercise diary and activity tracker | 30 days            | Aerobic exercise (walking)                                                        | 5x/ week                                                                    | Not specified                                                                                                           | Not specified                                              |
| 16-18 | Gill; Powell; Powell      | 2018; 2018; 2020 | X | Qualitative; prospective intervention | BELT program; FLOW  | USA | University, hospital                                             | Supervised exercise training; behavioral change intervention            | 12 weeks; 16 weeks | Aerobic exercise, resistance training                                             | 3x/ week                                                                    | Doctoral-level, registered clinical exercise physiologist (RCEP), Doctoral-level graduate students; assistant professor | ACSM, NASM                                                 |
| 19-21 | Halperin; Panosian; Hamdy | 2014; 2017; 2018 | X | RCT; review                           | Why WAIT; SLIMM-T2D | USA | Clinic; university hospital                                      | Supervised exercise training; unsupervised exercise training            | 12 weeks           | Aerobic exercise, resistance training, flexibility training                       | 3-4x/ week (Weeks 1-4); 5x/ week (Weeks 5-8); 6x/ week (Weeks 9-12); Weekly | RCEP                                                                                                                    | Masters in kinesiology and nutrition                       |
| 22    | Hickey                    | 1999             | X | Prospective intervention              | None                | USA | University laboratory                                            | Supervised exercise training                                            | 7 days             | Aerobic exercise (treadmill and cycle ergometer)                                  | Daily                                                                       | Masters-level graduate student                                                                                          | ACSM                                                       |
| 23    | Huck                      | 2015             | X | Quasi-experimental                    | None                | USA | University laboratory, private community-based training facility | Supervised exercise training                                            | 12 weeks           | Aerobic exercise, resistance training, stretching                                 | 2x/ week (Weeks 1-6); 3x/ per week (Weeks 6-12)                             | Graduate professor; CSCS, CPT                                                                                           | PhD                                                        |
| 24    | Kalarchian                | 2013             | X | RCT                                   | None                | USA | University hospital, bariatric clinic                            | Physician-supervised diet and exercise training                         | 26 weeks           | Participants were given a goal of 30 minutes of physical activity (PA) at least 5 | 12 individual, face-to-face sessions and 12 telephone contacts              | Non-exercise professionals                                                                                              | Not specified                                              |

|    |          |      |   |             |                |     |                                    |                                                                                                                                 |          | days per week<br>(non-exercise)                                                                       |                                                                                                  |                                |                   |
|----|----------|------|---|-------------|----------------|-----|------------------------------------|---------------------------------------------------------------------------------------------------------------------------------|----------|-------------------------------------------------------------------------------------------------------|--------------------------------------------------------------------------------------------------|--------------------------------|-------------------|
| 25 | Kelley   | 2006 | X | Editorial   | Exercise Right | USA | Hospital                           | Unsupervised exercise training                                                                                                  | 6 weeks  | Not specified                                                                                         | Not specified other than post evaluation and quarterly or semiannual basis follow-up assessments | Exercise physiologist          | Bachelor's degree |
| 26 | Kerrigan | 2012 | X | Case study  | None           | USA | Hospital, bariatric center         | Unsupervised exercise training                                                                                                  | 8 weeks  | Aerobic exercise (walking, treadmill, recumbent stepper, swimming), chair aerobics                    | 3-4x/ week                                                                                       | Clinical exercise physiologist | Not specified     |
| 27 | Klasnja  | 2020 | X | Pilot study | BariFit        | USA | Public hospital                    | Mobile health intervention                                                                                                      | 16 weeks | Adaptive step goals                                                                                   | Daily                                                                                            | Research specialist            | Not specified     |
| 28 | Parikh   | 2012 | X | RCT         | None           | USA | University hospital                | Medically supervised weight management, nutrition, physical activity education, individualized behavior modification counseling | 26 weeks | Not specified                                                                                         | Monthly                                                                                          | Dietitian                      | Not specified     |
| 39 | Shah     | 2011 | X | RCT         | None           | USA | University hospital fitness center | Semi-supervised exercise training with exercise diaries and heart rate monitors                                                 | 12 weeks | Aerobic exercise                                                                                      | 5x/ week (with 1-2 days at the fitness center)                                                   | Exercise physiologist          | PhD               |
| 30 | Zagarins | 2011 | X | Descriptive | None           | USA | Hospital, at home                  | Supervised exercise training                                                                                                    | 12 weeks | Aerobic exercise (walking, treadmills, recumbent exercise bicycles, ellipticals), resistance training | 1x/ week (weekly)                                                                                | Exercise physiologist; CPT     | Not specified     |

\* Various trials/studies resulted in multiple publications, which were combined.

\*\* National Strength and Conditioning Association (NSCA), Certified Strength and Conditioning Specialist (CSCS)

1011

1012

**Table 1B. Details of studies from outside the USA**

| Studies # * | First author                              | Year                           | Included in data extraction (co-authors MSK and MD)    | Study Type               | Study Name         | Country of corresponding author | Setting                         | Program type                                            | Program length   | Mode of exercise training                                             | Patient contact frequency                         | Exercise professional                                                 | Training/education / credentialing (if noted) |
|-------------|-------------------------------------------|--------------------------------|--------------------------------------------------------|--------------------------|--------------------|---------------------------------|---------------------------------|---------------------------------------------------------|------------------|-----------------------------------------------------------------------|---------------------------------------------------|-----------------------------------------------------------------------|-----------------------------------------------|
| 1-4         | Auclair; Lemiux-Simard; Pettigrew; Tardif | 2020; 2021; 2019; 2020         | Auclair – X<br>LS – NO<br>Pettigrew - NO<br>Tardif - X | RCT                      | ACTIVE             | Canada                          | University hospital             | Supervised exercise training                            | 12 weeks         | Aerobic exercise, strength training                                   | 3x/ week                                          | Clinical Exercise Specialist (CES)                                    | ACSM                                          |
| 5-8         | Baillet; Baillet; Baillet; Baillet        | 2013; 2016; 2016; 2018         | X                                                      | Pilot study; RCT         | PreSET; TelePreSET | Canada                          | Hospital; at home               | In-person and virtual semi-supervised exercise training | 12 weeks         | Endurance training, strength training, Aquagym                        | 2-3x /week on site (+ sessions at home if missed) | Doctoral-level kinesiologist                                          | Not specified                                 |
| 9           | Brown                                     | 2016                           | X                                                      | Prospective intervention | None               | Australia                       | University hospital             | Virtual behavioral education                            | 1 year           | Not specified                                                         | 3x/ week                                          | Nurse manager                                                         | Not specified                                 |
| 10          | Brun                                      | 2019                           |                                                        | Longitudinal study       | None               | France                          | University hospital             | Supervised exercise training                            | 5 years          | Endurance training                                                    | 3x/ week                                          | Not specified                                                         | Not specified                                 |
| 11          | Campanha-Versiani                         | 2017                           | X                                                      | Quasi-experimental       | None               | Brazil                          | University hospital             | Supervised exercise training and unsupervised training  | 36 weeks; 1 year | Weight-bearing exercise, aerobic exercise                             | 2x / week                                         | Not specified                                                         | Not specified                                 |
| 12-13       | Castello; Castello-Simões                 | 2011; 2013                     | X                                                      | RCT                      | None               | Brazil                          | University laboratory           | Supervised exercise training                            | 12 weeks         | Aerobic exercise                                                      | 3x / week                                         | Doctoral-level physiotherapist                                        | Not specified                                 |
| 14-18       | Dantas; Dantas; Gil; Gil; Murai           | 2018; 2020; 2021A; 2021B; 2019 | Dantas – X<br>Dantas – X<br>Gil – NO<br>Murai – NO     | RCT                      | None               | Brazil                          | University laboratory; hospital | Supervised exercise training                            | 26 weeks         | Aerobic exercise, resistance training                                 | 3x / week                                         | Doctoral-level graduate student in exercise physiology                | Not specified                                 |
| 19          | Da Silva                                  | 2015                           | X                                                      | Case report              | None               | Brazil                          | Clinic; laboratory              | Supervised exercise training                            | 26 weeks         | Resistance training exercises, aerobic exercise, flexibility training | 3x/ week                                          | Physical education teacher with specialization in exercise physiology | Doctoral level                                |
| 20          | de Oliveira                               | 2016                           | X                                                      | RCT                      | None               | Brazil                          | University hospital             | Supervised exercise training                            | 30 days          | Customized program of walking, breathing exercises, some resistance   | 2x/ week                                          | Physiotherapist                                                       | Not specified                                 |



|       |                  |            |   |             |      |                |                              |                                                                                        |          |                                                                                                                           |                                                                          |                                                                                      |                                                                                             |
|-------|------------------|------------|---|-------------|------|----------------|------------------------------|----------------------------------------------------------------------------------------|----------|---------------------------------------------------------------------------------------------------------------------------|--------------------------------------------------------------------------|--------------------------------------------------------------------------------------|---------------------------------------------------------------------------------------------|
|       |                  |            |   |             |      |                |                              |                                                                                        |          | exercises (1kg), and stretching                                                                                           |                                                                          |                                                                                      |                                                                                             |
| 21-22 | Egberts; Egberts | 2010; 2011 | X | RCT         | None | Australia      | University hospital          | Supervised exercise training                                                           | 12 weeks | Not specified                                                                                                             | Not specified                                                            | Certified Personal Trainer (CPT)                                                     | Not specified                                                                               |
| 23    | González-Cutre   | 2019       | X | Qualitative | None | Spain          | University laboratory        | Motivational physical activity program                                                 | 26 weeks | Endurance training, resistance training with machines, games, directed activities, dance, body expression, core-training  | 2x/ week (Months 1 & 2); 3/ week (Months 3 & 4); 4x/ week (Months 5 & 6) | Sports science professional instructors                                              | Master's degree                                                                             |
| 24    | Hanvold          | 2019       | X | RCT         | None | Norway         | University hospital          | Group-based lifestyle intervention with supervised exercise training                   | 2 years  | Measurements of body weight, lecture on given topic, group work and/or assignment, 30-minute supervised physical activity | 16 group meetings over 2 years                                           | Clinical dietitians                                                                  | PhD and masters' students                                                                   |
| 25    | Hassannejad      | 2017       | X | RCT         | None | Iran           | University laboratory        | Unsupervised exercise training                                                         | 12 weeks | Walking, resistance training                                                                                              | 3-5x/ week (Weeks 5-12)                                                  | No supervision                                                                       | Sports medicine specialist                                                                  |
| 26    | Herrera          | 2020       |   | RCT         | None | Chile          | Public hospital              | Supervised exercise training                                                           | 16 weeks | Moderate-intensity continuous training (MICT), high-intensity interval training (HIIT)                                    | 2x/ week                                                                 | Physical therapist                                                                   | Not specified                                                                               |
| 27    | Herring          | 2017       | X | RCT         | None | United Kingdom | University hospital; at home | Supervised exercise training                                                           | 12 weeks | Aerobic exercise, resistance training                                                                                     | 3x/ week                                                                 | Exercise and sports science professional/ REPS Gym instructor/ exercise physiologist | PhD physical activity, lifestyle and bariatric surgery; MSc clinical exercise science; REPS |
| 28    | Jassil           | 2015       | X | Pilot study | None | United Kingdom | University hospital; at home | Supervised exercise training; lifestyle education; nutritional/behavioral intervention | 8 weeks  | Circuit training                                                                                                          | Weekly; 5x/ week                                                         | Physiotherapist, Exercise specialist                                                 | Not specified                                                                               |

|       |                                                    |                              |                       |                               |            |           |                                            |                                                         |                    |                                                                                                                           |                                                                                 |                                                          |                                                                                          |
|-------|----------------------------------------------------|------------------------------|-----------------------|-------------------------------|------------|-----------|--------------------------------------------|---------------------------------------------------------|--------------------|---------------------------------------------------------------------------------------------------------------------------|---------------------------------------------------------------------------------|----------------------------------------------------------|------------------------------------------------------------------------------------------|
| 29    | Jiménez-Loaisa                                     | 2020                         | X                     | Quasi-experimental            | None       | Spain     | University public fitness center           | Motivational physical activity intervention (MPAI)      | 26 weeks           | Aerobic exercise, resistance training with machines, body expression, dance, directed activities, swimming, core training | 2x/ week (Months 1 & 2); 3x/ week (Months 3 & 4); 4x/ week (Months 5 & 6)       | Exercise and sport science professionals                 | Degree in sports science; master's degree in physical activity and health                |
| 30-31 | Marc-Hernández ; Marc-Hernández                    | 2019; 2020                   | 2019 – X<br>2020 – NO | Prospective intervention; RCT | EFIBAR RCT | Spain     | University laboratory; university hospital | Supervised exercise training                            | 12 weeks; 20 weeks | Endurance training, resistance training, HIIT training, flexibility training                                              | 3x/ week; 2x/ week (Weeks 1-4); 3x/ week (Weeks 5-8); 4x/ week (Weeks 9-16)     | Supervised by undergraduate students in exercise science | PhD in exercise science created the program; not certified by major credentialing bodies |
| 32    | Marchesi                                           | 2015                         | X                     | Prospective intervention      | None       | Italy     | University hospital                        | Supervised and unsupervised exercise training           | 43 weeks           | Indoor or outdoor road running                                                                                            | 3x/ week                                                                        | Sports physician (MD), CPT                               | Not specified                                                                            |
| 33-34 | Marcon; Marcon                                     | 2011; 2017                   | X                     | Case series; RCT              | PESO III   | Brazil    | University; hospital                       | Supervised and unsupervised exercise training           | 26 weeks; 16 weeks | Aerobic exercise, walking, stretching                                                                                     | 1x/ week; 2x/ week                                                              | PhD researcher/physical education teacher                | Masters/PhD level                                                                        |
| 35    | Morana                                             | 2018                         | X                     | Pilot study                   | None       | France    | Physical therapy clinic                    | Supervised exercise training; functional rehabilitation | 10 weeks           | Endurance training, rowing, core exercises, proprioception work, coordination                                             | 2x/ week                                                                        | Physiotherapist                                          | Not specified                                                                            |
| 36-40 | Mundbjerg; Mundbjerg; Stolberg; Stolberg; Stolberg | 2018; 2018; 2018; 2018; 2018 | X                     | RCT                           | None       | Denmark   | Public fitness center                      | Supervised exercise training                            | 26 weeks           | Endurance training, resistance training                                                                                   | 2x/ week                                                                        | Physiotherapist                                          | Not specified                                                                            |
| 41    | Muschitz                                           | 2015                         | X                     | RCT                           | BABS       | Austria   | University hospital                        | Unsupervised exercise training with diary monitoring    | 2 years            | Nordic walking, strength perseverance, equipment training                                                                 | 3x/ week (Nordic walking), 2x/ week (strength perseverance, equipment training) | Physical medicine expert                                 | Not specified                                                                            |
| 42    | Ng                                                 | 2015                         | X                     | Prospective intervention      | LIFE       | Singapore | Hospital                                   | Semi-supervised exercise training                       | 12 weeks           | Not specified                                                                                                             | Monthly                                                                         | PhD physiotherapist/exercise physiologist,               | All with bachelors degree (or                                                            |

|    |                   |      |   |                                     |         |           |                                 |                                                     |                 |                                                                                           |                                                                        |                                                                                         |                                                                                                                                    |
|----|-------------------|------|---|-------------------------------------|---------|-----------|---------------------------------|-----------------------------------------------------|-----------------|-------------------------------------------------------------------------------------------|------------------------------------------------------------------------|-----------------------------------------------------------------------------------------|------------------------------------------------------------------------------------------------------------------------------------|
|    |                   |      |   |                                     |         |           |                                 |                                                     |                 |                                                                                           |                                                                        | masters-level<br>physiotherapis<br>t/exercise<br>physiologist,<br>therapy<br>assistants | higher) in<br>physiothe<br>rapy. 3<br>with<br>Masters.<br>1 with<br>PhD.                                                           |
| 43 | Onofre            | 2017 | X | Pilot<br>study                      | None    | Brazil    | University<br>laboratory        | Supervised exercise<br>training                     | 12 weeks        | Aerobic exercise,<br>resistance<br>training,<br>stretching                                | 3x/ week                                                               | Physiotherapis<br>t                                                                     | Trained<br>in cardiac<br>and<br>metabolic<br>rehabilitat<br>ion                                                                    |
| 43 | Picó-Sirvent      | 2019 | X | Pilot<br>study                      | None    | Spain     | University<br>laboratory        | Supervised exercise<br>training                     | 26 weeks        | Aerobic exercise,<br>resistance<br>training, HIIT<br>training                             | 2x/ week (Month<br>1), 3x/ week<br>(Month 2), 4x/<br>week (Months 3-6) | Supervised<br>undergraduate<br>students in<br>exercise<br>science                       | Not<br>specified                                                                                                                   |
| 44 | Proulx            | 2018 | X | Prospec<br>tive<br>intervent<br>ion | None    | Canada    | University<br>fitness center    | Supervised exercise<br>training                     | 12 weeks        | Aerobic exercise,<br>resistance<br>training                                               | 3x/ week                                                               | Certified<br>clinical<br>exercise<br>specialist                                         | Not<br>specified                                                                                                                   |
| 46 | Ricci             | 2020 | X | RCT                                 | None    | Brazil    | University<br>laboratory        | Supervised exercise<br>training                     | 6 weeks         | Whole-body<br>electromyostimul<br>ation, dynamic<br>exercise                              | 5x/ week                                                               | Physiotherapis<br>t                                                                     | Not<br>specified                                                                                                                   |
| 47 | Rojhani-Shirazi   | 2016 | X | RCT                                 | None    | Iran      | University<br>laboratory        | Supervised exercise<br>training                     | 4 weeks         | Balance training                                                                          | 4x/ week                                                               | Physical<br>therapist                                                                   | Master's<br>degree                                                                                                                 |
| 48 | Rothwell          | 2015 | X | Retrospe<br>ctive<br>review         | BandFit | Australia | Private<br>hospital, at<br>home | Supervised and<br>unsupervised<br>exercise training | 1 year; 3 years | "BandFit", a<br>personal trainer-<br>led education<br>and participant<br>exercise program | Variable (0, 1, or<br>more than 1<br>sessions)                         | CPT                                                                                     | Not<br>specified                                                                                                                   |
| 49 | Stegen            | 2011 | X | Pilot<br>study                      | None    | Belgium   | University<br>hospital          | Supervised exercise<br>training                     | 12 weeks        | Endurance<br>training,<br>resistance<br>training                                          | 3x/ week                                                               | Movement and<br>rehabilitation<br>expert                                                | Master's<br>degree                                                                                                                 |
| 50 | Soriano-Maldonado | 2020 | X | RCT                                 | EMOVAR  | Spain     | University<br>fitness center    | Supervised exercise<br>training                     | 16 weeks        | Aerobic exercise,<br>resistance<br>training                                               | 3x/ week                                                               | CPT                                                                                     | Grade in<br>physical<br>activity<br>and<br>sports<br>sciences,<br>and<br>either a<br>master's<br>degree in<br>personal<br>training |

|                                                                                  |                        |            |                       |     |        |        |                           |                              |          |                                       |          |                        |                                               |
|----------------------------------------------------------------------------------|------------------------|------------|-----------------------|-----|--------|--------|---------------------------|------------------------------|----------|---------------------------------------|----------|------------------------|-----------------------------------------------|
|                                                                                  |                        |            |                       |     |        |        |                           |                              |          |                                       |          |                        | or >2 years' experience training obese people |
| 51-52                                                                            | Villa-González; Artero | 2019; 2021 | VG – X<br>Artero – NO | RCT | EFIBAR | Spain  | University fitness center | Supervised exercise training | 16 weeks | Aerobic exercise, resistance training | 3x/ week | CPT                    | Bachelor's degree                             |
| 53                                                                               | Wiklund                | 2015       | X                     | RCT | None   | Sweden | University hospital       | Supervised exercise training | 1 week   | Walking with step counter             | Daily    | Nurse, Physiotherapist | Not specified                                 |
| * Various trials/studies resulted in multiple publications, which were combined. |                        |            |                       |     |        |        |                           |                              |          |                                       |          |                        |                                               |

| <b>Table 2. Summary of bin sort per analyst.</b> |           |           |           |           |            |           |           |           |           |           |                |
|--------------------------------------------------|-----------|-----------|-----------|-----------|------------|-----------|-----------|-----------|-----------|-----------|----------------|
| <b>Rater #</b>                                   | <b>1</b>  | <b>2</b>  | <b>3</b>  | <b>4</b>  | <b>5</b>   | <b>6</b>  | <b>7</b>  | <b>8</b>  | <b>9</b>  | <b>10</b> | <b>Average</b> |
| <b>Rater initials</b>                            | <b>DB</b> | <b>CG</b> | <b>EB</b> | <b>BG</b> | <b>MSK</b> | <b>LR</b> | <b>JH</b> | <b>LH</b> | <b>RM</b> | <b>MD</b> |                |
| <b>Bins completed (#)</b>                        | 12        | 14        | 10        | 11        | 14         | 11        | 10        | 11        | 10        | 15        | 11.8           |
| <b>Bins w/ 8 items</b>                           | 0         | 1         | 1         | 0         | 0          | 0         | 1         | 0         | 0         | 0         | 0.3            |
| <b>Bins w/ 7 items</b>                           | 0         | 1         | 1         | 0         | 0          | 0         | 1         | 0         | 0         | 0         | 0.3            |
| <b>Bins w/ 6 items</b>                           | 0         | 0         | 0         | 1         | 0          | 3         | 1         | 3         | 2         | 1         | 1.1            |
| <b>Bins w/ 5 items</b>                           | 5         | 0         | 1         | 2         | 1          | 0         | 1         | 2         | 3         | 1         | 1.6            |
| <b>Bins w/ 4 items</b>                           | 1         | 1         | 2         | 2         | 2          | 2         | 1         | 0         | 2         | 4         | 1.7            |
| <b>Bins w/ 3 items</b>                           | 3         | 5         | 3         | 1         | 5          | 4         | 2         | 2         | 2         | 1         | 2.8            |
| <b>Bins w/ 2 items</b>                           | 1         | 3         | 2         | 2         | 4          | 0         | 1         | 3         | 1         | 5         | 2.2            |
| <b>Bins w/ 1 items</b>                           | 2         | 3         | 0         | 3         | 1          | 2         | 2         | 1         | 0         | 3         | 1.7            |
| <b>Items to discard</b>                          | 0         | 0         | 2         | 7         | 3          | 2         | 2         | 2         | 0         | 0         | 1.8            |
| <b>Ave items/bin*</b>                            | 3.5       | 3.1       | 4.1       | 3.3       | 2.9        | 3.7       | 4.1       | 3.7       | 4.3       | 2.9       | 3.6            |
| <b>Items missing to add</b>                      | 0         | 14        | 0         | 7         | 0          | 5         | 6         | 0         | 2         | 0         | 3.4            |
|                                                  |           |           |           |           |            |           |           |           |           |           |                |
| * ([# items – discarded items]/bins completed)   |           |           |           |           |            |           |           |           |           |           |                |

1014

1015



| Super higher order task theme (SHOT) # | Super higher order task theme (SHOT)                          | SHOT Description / Interpretation                                                                                                                                                                                                                                                                                                                                                                                         | Higher order task theme (HOT) # | Higher order task theme (HOT)                                                | Lower Order Task Theme (LOT) # | Lower Order Task Theme (LOT)            |
|----------------------------------------|---------------------------------------------------------------|---------------------------------------------------------------------------------------------------------------------------------------------------------------------------------------------------------------------------------------------------------------------------------------------------------------------------------------------------------------------------------------------------------------------------|---------------------------------|------------------------------------------------------------------------------|--------------------------------|-----------------------------------------|
| 1                                      | Exercise-related health assessment                            | Perform pre-participation screening, and identify comorbidities. Conduct baseline assessments of vitals. Utilize established and valid protocols to determine aerobic fitness and cardiac risk. Interpret data and track progress.                                                                                                                                                                                        | 1                               | Risk factor and needs identification                                         | 1                              | Risk factor identification              |
|                                        |                                                               |                                                                                                                                                                                                                                                                                                                                                                                                                           |                                 |                                                                              | 2                              | Needs assessment                        |
|                                        |                                                               |                                                                                                                                                                                                                                                                                                                                                                                                                           | 2                               | Exercise-related health assessment                                           | 3                              | Stress testing                          |
|                                        |                                                               |                                                                                                                                                                                                                                                                                                                                                                                                                           |                                 |                                                                              | 4                              | Vitals                                  |
|                                        |                                                               |                                                                                                                                                                                                                                                                                                                                                                                                                           |                                 |                                                                              | 5                              | ECG & other cardiopulmonary assessments |
| 2                                      | Body composition and physical fitness assessment              | Assess fat and lean mass. Evaluate muscular strength, endurance & power, balance, and other indicators of physical fitness and function. Interpret data to utilize for prescription and as indicators of program effectiveness.                                                                                                                                                                                           | 3                               | Body composition assessment                                                  | 6                              | Body composition testing                |
|                                        |                                                               |                                                                                                                                                                                                                                                                                                                                                                                                                           |                                 |                                                                              | 7                              | Anthropometry                           |
|                                        |                                                               |                                                                                                                                                                                                                                                                                                                                                                                                                           | 4                               | Fitness testing                                                              | 8                              | Fitness testing                         |
|                                        |                                                               |                                                                                                                                                                                                                                                                                                                                                                                                                           |                                 |                                                                              | 9                              | Balance testing                         |
|                                        |                                                               |                                                                                                                                                                                                                                                                                                                                                                                                                           |                                 |                                                                              | 10                             | Strength testing                        |
| 3                                      | Lifestyle physical activity and sedentary behavior assessment | Assess 24-hour, free-living physical activity behavior, including sedentary behavior, light, moderate and vigorous activity. Evaluate for baseline and tracking over time with validated surveys, wearables and/or accelerometry. Measure steps, sitting time and caloric expenditure. Interpret data to utilize for prescription and as indicators of program effectiveness.                                             | 5                               | Lifestyle physical activity and sedentary behavior assessment (same as SHOT) | 11                             | Physical function testing               |
|                                        |                                                               |                                                                                                                                                                                                                                                                                                                                                                                                                           |                                 |                                                                              | 12                             | PA/Sedentary assessment                 |
|                                        |                                                               |                                                                                                                                                                                                                                                                                                                                                                                                                           |                                 |                                                                              | 13                             | PA/Sedentary monitoring                 |
|                                        |                                                               |                                                                                                                                                                                                                                                                                                                                                                                                                           |                                 |                                                                              | 14                             | Accelerometry                           |
|                                        |                                                               |                                                                                                                                                                                                                                                                                                                                                                                                                           |                                 |                                                                              | 15                             | Fitness and Health Education            |
| 4                                      | Education, instruction, and prescription                      | Promote literacy of fitness and its effect on health. Educate patients in principles of enhancing physical activity and reducing sedentarism across the entire day. Guide patients in exercise basics (e.g., specificity, overload) to promote fitness and health outcomes in the clinic and independently at home (self-management). Conduct safe, adaptive and individualized programming to ensure continued progress. | 6                               | Fitness and health education                                                 | 16                             | Orientation                             |
|                                        |                                                               |                                                                                                                                                                                                                                                                                                                                                                                                                           |                                 |                                                                              | 17                             | Exercise training                       |
|                                        |                                                               |                                                                                                                                                                                                                                                                                                                                                                                                                           | 7                               | Physical activity instruction                                                | 18                             | Exercise instruction                    |
|                                        |                                                               |                                                                                                                                                                                                                                                                                                                                                                                                                           |                                 |                                                                              | 19                             | Prescription-individual (in clinic)     |
|                                        |                                                               |                                                                                                                                                                                                                                                                                                                                                                                                                           |                                 |                                                                              | 20                             | Prescription-home (free living)         |
|                                        |                                                               |                                                                                                                                                                                                                                                                                                                                                                                                                           | 8                               | Exercise prescription                                                        | 21                             | Prescription-group (in clinic)          |
|                                        |                                                               |                                                                                                                                                                                                                                                                                                                                                                                                                           |                                 |                                                                              | 22                             | Modification                            |
|                                        |                                                               |                                                                                                                                                                                                                                                                                                                                                                                                                           | 9                               | Personalization                                                              | 23                             | Individualization                       |
|                                        |                                                               |                                                                                                                                                                                                                                                                                                                                                                                                                           |                                 |                                                                              | 24                             | Progression                             |
| 5                                      | Exercise monitoring                                           | Supervise group and/or individual exercise training. Monitor hemodynamic and metabolic responses, signs and symptoms with both subjective/self-report and objective (both active and passive) instruments, including wearables, CGM and other digital assessments.                                                                                                                                                        | 10                              | Metabolic assessment                                                         | 25                             | Adjustments                             |
|                                        |                                                               |                                                                                                                                                                                                                                                                                                                                                                                                                           |                                 |                                                                              | 26                             | Metabolic testing                       |
|                                        |                                                               |                                                                                                                                                                                                                                                                                                                                                                                                                           | 11                              | Monitoring                                                                   | 27                             | Glucose testing (clinic / lab)          |
|                                        |                                                               |                                                                                                                                                                                                                                                                                                                                                                                                                           |                                 |                                                                              | 28                             | Glucose monitoring (peri-exercise)      |
|                                        |                                                               |                                                                                                                                                                                                                                                                                                                                                                                                                           |                                 |                                                                              | 29                             | Symptom monitoring                      |
|                                        |                                                               |                                                                                                                                                                                                                                                                                                                                                                                                                           |                                 |                                                                              | 30                             | HR monitoring                           |
|                                        |                                                               |                                                                                                                                                                                                                                                                                                                                                                                                                           |                                 |                                                                              | 31                             | Supervision (group)                     |
|                                        |                                                               |                                                                                                                                                                                                                                                                                                                                                                                                                           |                                 |                                                                              | 32                             | Monitoring (individual)                 |
|                                        |                                                               |                                                                                                                                                                                                                                                                                                                                                                                                                           |                                 |                                                                              | 33                             | Exercise monitoring                     |
|                                        |                                                               |                                                                                                                                                                                                                                                                                                                                                                                                                           |                                 |                                                                              | 34                             | Effort/Exertion monitoring              |
| 6                                      | Behavioral counseling and psychosocial support                | Promote physical activity with basics of behavior change, such as goal setting, social support, and reinforcement, within scope of profession. Demonstrate encouragement and follow up for continued success. Reinforce and support psychosocial recommendations from licensed psychology and social work professionals. Refer to these professionals when indicated/necessary.                                           | 12                              | Counseling techniques                                                        | 35                             | PA/sedentary counseling                 |
|                                        |                                                               |                                                                                                                                                                                                                                                                                                                                                                                                                           |                                 |                                                                              | 36                             | Motivation & feedback                   |
|                                        |                                                               |                                                                                                                                                                                                                                                                                                                                                                                                                           | 13                              | Psychosocial support                                                         | 37                             | Goal setting                            |
|                                        |                                                               |                                                                                                                                                                                                                                                                                                                                                                                                                           |                                 |                                                                              | 38                             | Exercise prescription adherence         |
|                                        |                                                               |                                                                                                                                                                                                                                                                                                                                                                                                                           |                                 |                                                                              | 39                             | Support group                           |
| 7                                      | Dietary support                                               | Reinforce and support dietary recommendations from licensed nutrition professionals. Support nutrition basics, such as energy balance and exercise-related nutrient monitoring, within scope of profession. Refer to nutrition professionals when indicated/necessary.                                                                                                                                                    | 14                              | Dietary support (same as SHOT)                                               | 40                             | Psychosocial assessment                 |
|                                        |                                                               |                                                                                                                                                                                                                                                                                                                                                                                                                           |                                 |                                                                              | 41                             | Food monitoring                         |
|                                        |                                                               |                                                                                                                                                                                                                                                                                                                                                                                                                           |                                 |                                                                              | 42                             | Food assessment                         |

1016

1017 Table 3. Final model with descriptions for the task Super Higher Order Themes (SHOTs)

**Supplemental Table 1. Criteria for task identification and classification.**

|   | Task Category from Table 2                                     | Does NOT include                                                                                                                                            | Explicit (X symbol)                                                                                                                                                    | Implicit ( / symbol) suggesting strongly that it was conducted                    | Notes and search criteria                                                                                                                                                     |
|---|----------------------------------------------------------------|-------------------------------------------------------------------------------------------------------------------------------------------------------------|------------------------------------------------------------------------------------------------------------------------------------------------------------------------|-----------------------------------------------------------------------------------|-------------------------------------------------------------------------------------------------------------------------------------------------------------------------------|
| 1 | Risk Factor and needs identification                           | Does <b>not</b> include:<br><br>Limitations due to age, weight status and various eligibility factors.<br><br>Signed approval from PCP/surgeon for exercise | 1. Exercise health & musculoskeletal screening,<br>2. determination of contraindications<br>3. Needs identification<br>Includes:<br>PAR-Q,                             | Inclusion/ exclusion criteria suggestive that a clinical screening was conducted. | Search for words: RISK / SCREENING / NEEDS / CONTRAINDICATIONS<br><br>In some studies, no additional exercise-related health screening was conducted (e.g., Parikh; Rothwell) |
| 2 | Exercise-related health assessment                             | Does <b>not</b> include:<br>Functional testing, like 6-minute walk tests                                                                                    | physical by a sports physician<br>Vitals (Blood pressure) – e.g., Funderburk<br>Bruce protocols<br>Modified-Bruce protocols                                            | VO2max data or similar was reported                                               |                                                                                                                                                                               |
| 3 | Body Composition Assessment                                    | Does <b>not</b> include:<br>Does not include simple weight, height and BMI.                                                                                 | Tests of percent body fat and resting metabolic rate and waist and hip circumferences.                                                                                 | Data suggestive of test completion                                                |                                                                                                                                                                               |
| 4 | Fitness testing                                                | Does <b>not</b> include:<br>“Perceived” fitness                                                                                                             | Other non-graded exercise tests, like the 6MWT or the Cooper Test.                                                                                                     | Data suggestive of test completion                                                |                                                                                                                                                                               |
| 5 | Lifestyle physical activity and sedentary behaviors assessment | Does <b>not</b> include:<br>Gym attendance                                                                                                                  | Accelerometry (i.e., Actigraph);<br>Fitness trackers (i.e., Fitbits)<br>Pedometry<br>Diaries / logs of activity                                                        | Step data included                                                                | Search for words: STEPS                                                                                                                                                       |
| 6 | Fitness and Health Education                                   | Does <b>not</b> include:<br>Information about the program                                                                                                   | Structured exercise curriculum<br>Includes “exercise guidelines” as provided in a control group for a RCT.<br>Exercise instructions for home.                          | Evidence of curriculum (e.g., table of contents)                                  |                                                                                                                                                                               |
| 7 | Physical Activity Instruction                                  | Does <b>not</b> include:<br>Structured exercise program                                                                                                     | Includes:<br>Familiarization<br>Dumbbells, resistance bands, bands,                                                                                                    | List of exercises that would infer that patient would need instruction            |                                                                                                                                                                               |
| 8 | Exercise Prescription                                          | Does <b>not</b> include:<br><br>Outside physical activity that a patient would routinely conduct on their own.<br>Exercise counseling about exercise        | Any exercise outside of the structured/supervised training program, as provided by the exercise professional.<br>Includes access to facility during non-training times | Text highly suggestive that a home program was being conducted                    | Search for words: HOME, OUTSIDE                                                                                                                                               |
|   |                                                                |                                                                                                                                                             | Prescribed exercise training program defined by exercise variables, such as:<br>Minutes/time (duration)                                                                | Text highly suggestive that a standardized program was being conducted.           |                                                                                                                                                                               |

|    |                      |                                                                                                                                                         |                                                                                                                                                                                                                                                  |                                                                                                                                                         |                                                                                                                                                                                       |
|----|----------------------|---------------------------------------------------------------------------------------------------------------------------------------------------------|--------------------------------------------------------------------------------------------------------------------------------------------------------------------------------------------------------------------------------------------------|---------------------------------------------------------------------------------------------------------------------------------------------------------|---------------------------------------------------------------------------------------------------------------------------------------------------------------------------------------|
|    |                      | Exercise or PA education                                                                                                                                | Frequency of exercise<br>Type/Mode<br>Etc.<br>Early ambulation program                                                                                                                                                                           |                                                                                                                                                         |                                                                                                                                                                                       |
| 9  | Personalization      | Does <b>not</b> include:<br>General guidelines are given to all/most patients<br><br>Different guidelines/instructions for two or more different groups | Customization, individualization and/or modification based on needs/ health status<br>Modifications based on pain and tolerance<br>Implied if they use heart rate % to prescribe the exercise.<br>"Optimization" of exercise program             | Heart rate zone provision<br><br>If a case study, it is assumed to be individualized for the patient.                                                   | Search for words:<br><br>Individualization, Modification, Customization                                                                                                               |
|    |                      | Does <b>not</b> include:<br>Standardized exercise prescription that does not change over time.                                                          | Weekly, bi-weekly or monthly changes based on a variety of factors, like improvements in fitness or less limitations.                                                                                                                            | Adjustments made but the criteria by which the adjustments are made is not clear, or it is not applicable for all patients (only some were progressed). | Search for words:<br>Progression<br>Increment*                                                                                                                                        |
| 10 | Metabolic Assessment | Does <b>not</b> include:<br>HR <u>prescription</u> only                                                                                                 | Also includes BP and SPO2 and glucose<br>Additional action if parameters are out-of-expected range.                                                                                                                                              | Data suggestive                                                                                                                                         | Search for words:<br>Heart rate<br>Glucose<br>Blood sugar                                                                                                                             |
| 11 | Monitoring           | Does <b>not</b> include:<br>Any activities in which patients were not within sight.                                                                     | Includes orientation and familiarization and training to ensure safety and low abdominal pressure<br>Supervision / Supervised exercise training, including instruction, guiding and feedback<br>Teaching the Borg exertion scale to self-monitor | Text highly suggestive that feedback was being provided.                                                                                                | In many studies, it is not clear if some monitoring was passive or strictly active (i.e., passive monitoring from a desk/station at a gym vs. continuous supervision of each patient. |
| 12 | Counseling Technique | Does <b>not</b> include:<br>Education<br>Passing out guidelines<br>General advice                                                                       | Instructions on goal setting, motivational interviewing or other techniques<br>Contingency planning ("if this happens, do this...")<br>Strategies to build confidence through experiences                                                        | Evidence of strategies (e.g., from a table)                                                                                                             |                                                                                                                                                                                       |
| 13 | Psychosocial Support | Does <b>not</b> include:<br>Therapy<br>Other services necessitating psychiatry licenses                                                                 | Onward Referral<br>Support of Psycho/Social Worker                                                                                                                                                                                               | Tables with psychological data in it in methods or results, information in regards to psychosocial assessments                                          |                                                                                                                                                                                       |
| 14 | Dietary Support      | Does <b>not</b> include:<br>Therapy<br>Other treatments necessitating licensing of dieticians                                                           | Education of basic consulting on bariatric dietary basics per-post surgery, (PPO?)<br>Supplements, Macros, Importance of vitamins); energy balance<br>Assessment<br>Onward referral                                                              | Lists of information about macronutrients, etc.                                                                                                         |                                                                                                                                                                                       |

1019

| Supplemental Table 2a. Patient-care-related tasks completed by the exercise professional for each study: Recode and re-review for 14 higher-order themes (HOTS) within 7 super higher-order themes (SHOTS) <sup>1, 2, 3</sup> |                                        |                                       |                                                  |                    |                                                                  |                                          |                                  |                          |                    |                          |                |                                                |                          |                     |
|-------------------------------------------------------------------------------------------------------------------------------------------------------------------------------------------------------------------------------|----------------------------------------|---------------------------------------|--------------------------------------------------|--------------------|------------------------------------------------------------------|------------------------------------------|----------------------------------|--------------------------|--------------------|--------------------------|----------------|------------------------------------------------|--------------------------|---------------------|
|                                                                                                                                                                                                                               | EXERCISE-RELATED HEALTH ASSESSMENT     |                                       | BODY COMPOSITION AND PHYSICAL FITNESS ASSESSMENT |                    | LIFESTYLE PHYSICAL AND SEDENTARY BEHAVIOR ASSESSMENT             | EDUCATION, INSTRUCTION, AND PRESCRIPTION |                                  |                          |                    | EXERCISE MONITORING      |                | BEHAVIORAL COUNSELING AND PSYCHOSOCIAL SUPPORT |                          | DIETARY SUPPORT     |
| Citation;<br>(+) primary citation for study series                                                                                                                                                                            | 1- Risk factor or needs identification | 2- Exercise-Related Health Assessment | 3. Body Composition Assessment                   | 4. Fitness Testing | 5. Lifestyle physical activity and sedentary behavior assessment | 6. Exercise and Fitness Education        | 7. Physical Activity instruction | 8. Exercise Prescription | 9. Personalization | 10. Metabolic Assessment | 11. Monitoring | 12. Counseling Techniques                      | 13. Psychosocial Support | 14. Dietary Support |
| Auclair, 2020<br>Lemiux, 2021<br>Simard, 2019<br>Pettigrew, 2020<br>Tardif, 2020                                                                                                                                              | X                                      | X                                     | X                                                | X                  |                                                                  |                                          | X                                | X                        |                    | X                        | X              |                                                |                          |                     |
| Berggren, 2008                                                                                                                                                                                                                | /                                      | X                                     | X                                                | X                  |                                                                  |                                          | X-1:1                            | X-1:1                    |                    | X                        | X              |                                                |                          | X                   |
| Bond, 2015a<br>Bond, 2015 b<br>Bond, 2017                                                                                                                                                                                     | X                                      | X                                     | X                                                | X                  |                                                                  | X-1:1i                                   | X:1-1i                           | X-H                      | X                  |                          | X              | X                                              |                          |                     |
| Carnero, 2017<br>Coen, 2015a<br>Coen, 2015b<br>Lopez, 2017<br>Woodlief, 2015                                                                                                                                                  | X                                      | X                                     | X                                                | X                  | X                                                                |                                          |                                  | X                        | X                  | X                        | X              |                                                |                          |                     |
| Daniels, 2018                                                                                                                                                                                                                 | X                                      | X                                     | X                                                | X                  |                                                                  | X                                        |                                  | X:1                      |                    | X                        | X              | X                                              | X                        |                     |
| Dantas, 2020<br>Dantas, 2018<br>Gil, 2021a<br>Gil, 2021b<br>Murai, 2019                                                                                                                                                       | X                                      | X                                     | X                                                | X                  | X                                                                |                                          | X                                | X                        |                    | X                        | X              |                                                |                          |                     |
| Gill, 2018<br>Powell, 2018<br>Powell, 2020                                                                                                                                                                                    | X                                      | X                                     | X                                                | X                  | X                                                                | X                                        | X                                | X-G                      |                    |                          | X              | X                                              |                          | X                   |
| Halparin, 2014a                                                                                                                                                                                                               | X                                      | X                                     | X                                                | /                  | X                                                                | X                                        | /                                | X-G / X-1:1i             | X                  | X                        | X              | X                                              | X                        | X                   |

Supplemental Table 2a. Patient-care-related tasks completed by the exercise professional for each study: Recode and re-review for 14 higher-order themes (HOTS) within 7 super higher-order themes (SHOTS) <sup>1, 2, 3</sup>

|                                                                                          | EXERCISE-RELATED HEALTH ASSESSMENT     |                                       | BODY COMPOSITION AND PHYSICAL FITNESS ASSESSMENT |                    | LIFESTYLE PHYSICAL AND SEDENTARY BEHAVIOR ASSESSMENT             | EDUCATION, INSTRUCTION, AND PRESCRIPTION |                                  |                          |                    | EXERCISE MONITORING      |                | BEHAVIORAL COUNSELING AND PSYCHOSOCIAL SUPPORT |                          | DIETARY SUPPORT     |
|------------------------------------------------------------------------------------------|----------------------------------------|---------------------------------------|--------------------------------------------------|--------------------|------------------------------------------------------------------|------------------------------------------|----------------------------------|--------------------------|--------------------|--------------------------|----------------|------------------------------------------------|--------------------------|---------------------|
| Citation;<br>(+) primary citation for study series                                       | 1- Risk factor or needs identification | 2- Exercise-Related Health Assessment | 3. Body Composition Assessment                   | 4. Fitness Testing | 5. Lifestyle physical activity and sedentary behavior assessment | 6. Exercise and Fitness Education        | 7. Physical Activity Instruction | 8. Exercise Prescription | 9. Personalization | 10. Metabolic Assessment | 11. Monitoring | 12. Counseling Techniques                      | 13. Psychosocial Support | 14. Dietary Support |
| Halparin, 2015b<br>Panosian, 2017<br>Hamdy, 2018                                         |                                        |                                       |                                                  |                    |                                                                  |                                          |                                  |                          |                    |                          |                |                                                |                          |                     |
| Hickey, 1999                                                                             | X                                      | X                                     | X                                                | X                  | /                                                                | X                                        | /                                | X-1:1i                   |                    | X                        | X              |                                                |                          |                     |
| Huck, 2015                                                                               | X                                      | X                                     | X                                                | X                  | X                                                                |                                          | X                                | X                        |                    | X                        | X              | X                                              |                          |                     |
| Kelley, 2006                                                                             | X                                      | X                                     | X                                                | X                  | X                                                                | X                                        | /                                | X                        | X                  | X                        | X              | /                                              |                          | X                   |
| Kerrigan, 2012                                                                           | X                                      | X                                     | X                                                | X                  | X                                                                | X                                        | /                                | X-1:1i                   | X                  |                          | X              | X                                              |                          | X                   |
| Morana, 2018                                                                             | X                                      | X                                     | X                                                | X                  | X                                                                |                                          |                                  | X:1-1i                   | X                  | X                        | X              |                                                |                          |                     |
| Shah, 2011                                                                               | X                                      | X                                     | X                                                | X                  | X                                                                | X                                        |                                  | X / X-1:1i               |                    | X                        | X              | X                                              |                          | X                   |
| Zagarins, 2011                                                                           | X                                      | X                                     | /                                                | X                  | X                                                                | X                                        | X                                | X-1:1                    | X                  |                          | X              | X                                              |                          | X                   |
|                                                                                          | 15/15;<br>100%                         | 15/15;<br>100%                        | 15/15;<br>100%                                   | 15/15;<br>100%     | 11/15;<br>73%                                                    | 9/15;<br>60%                             | 11/15;<br>73%                    | 15/15;<br>100%           | 7/15;<br>47%       | 11/15;<br>73%            | 15/15;<br>100% | 9/15;<br>60%                                   | 2/15;<br>13%             | 7/15;<br>47%        |
| Castello, 2011<br>Castello-Simoes, 2013                                                  | X                                      | X                                     | X                                                | X                  | /                                                                |                                          | X                                | X: 1-1i                  | X                  | X                        | X              |                                                |                          |                     |
| de Oliveira, 2016                                                                        | X                                      | X                                     | X                                                | X                  |                                                                  |                                          | X                                | X:1-1i / X:Hi            |                    |                          | X              | X                                              |                          |                     |
| Herrera, 2020                                                                            | X                                      | X                                     | X                                                | X                  | X                                                                | X                                        | X                                | X-G                      |                    | X                        | X              |                                                |                          |                     |
| Jassil, 2015                                                                             | X                                      | /                                     | X                                                | /                  | X                                                                | X                                        |                                  | X                        | X                  | X                        | X              | X                                              |                          | X                   |
| Morana, 2018                                                                             | X                                      | X                                     | X                                                | X                  | X                                                                |                                          |                                  | X:1-1i                   | X                  | X                        | X              |                                                |                          |                     |
| Mundbjerg, 2018<br>Mundbjerg, 2018<br>Stolberg, 2018<br>Stolberg, 2018<br>Stolberg, 2018 | X                                      |                                       | X                                                |                    |                                                                  | X                                        | /                                | X                        | X                  | X                        | X              | X                                              |                          | X                   |
| Onofre, 2017                                                                             | X                                      | X                                     | X                                                | X                  |                                                                  |                                          |                                  | X                        | X                  | X                        | X              |                                                |                          |                     |
| Rojhani-Shirazi, 2016                                                                    | X                                      | /                                     | X                                                | X                  | X                                                                |                                          |                                  | /                        |                    |                          | X              |                                                |                          |                     |



Supplemental Table 2a. Patient-care-related tasks completed by the exercise professional for each study: Recode and re-review for 14 higher-order themes (HOTS) within 7 super higher-order themes (SHOTS) <sup>1, 2, 3</sup>

|                                                                  | EXERCISE-RELATED HEALTH ASSESSMENT     |                                       | BODY COMPOSITION AND PHYSICAL FITNESS ASSESSMENT |                    | LIFESTYLE PHYSICAL AND SEDENTARY BEHAVIOR ASSESSMENT             | EDUCATION, INSTRUCTION, AND PRESCRIPTION |                                  |                          |                    | EXERCISE MONITORING      |                | BEHAVIORAL COUNSELING AND PSYCHOSOCIAL SUPPORT |                          | DIETARY SUPPORT     |
|------------------------------------------------------------------|----------------------------------------|---------------------------------------|--------------------------------------------------|--------------------|------------------------------------------------------------------|------------------------------------------|----------------------------------|--------------------------|--------------------|--------------------------|----------------|------------------------------------------------|--------------------------|---------------------|
| Citation;<br>(+) primary citation for study series               | 1- Risk factor or needs identification | 2- Exercise-Related Health Assessment | 3. Body Composition Assessment                   | 4. Fitness Testing | 5. Lifestyle physical activity and sedentary behavior assessment | 6. Exercise and Fitness Education        | 7. Physical Activity Instruction | 8. Exercise Prescription | 9. Personalization | 10. Metabolic Assessment | 11. Monitoring | 12. Counseling Techniques                      | 13. Psychosocial Support | 14. Dietary Support |
| Ricci, 2020                                                      | X                                      | X                                     | X                                                | X                  |                                                                  |                                          | X                                | X                        |                    |                          | X              |                                                |                          |                     |
| Wiklund, 2015                                                    | X                                      | /                                     | X                                                |                    | X                                                                | X                                        | /                                | X                        | X                  |                          | X              |                                                |                          |                     |
|                                                                  | 10/10;<br>100%                         | 9/10;<br>90%                          | 10/10;<br>100%                                   | 8/10;<br>80%       | 6/10;<br>60%                                                     | 4/10;<br>40%                             | 5/10;<br>50%                     | 10/10;<br>100%           | 6/10;<br>60%       | 6/10;<br>60%             | 10/10;<br>100% | 3/10;<br>30%                                   | 0/10;<br>0%              | 2/10;<br>20%        |
| Baillet, 2013<br>Baillet, 2016<br>Baillet, 2016<br>Baillet, 2016 | X                                      | X                                     | X                                                | X                  | X                                                                |                                          |                                  | X-G / X-1:1              | X                  | X                        | X              | X                                              |                          | X                   |
| Brandonberg, 2005                                                | X                                      | /                                     | X                                                |                    | X                                                                | /                                        | X                                |                          |                    |                          | X              | X                                              |                          | X                   |
| Brown, 2016                                                      | X                                      |                                       | X                                                |                    |                                                                  |                                          |                                  |                          |                    |                          |                | X                                              |                          | X                   |
| Brun, 2019                                                       | X                                      | X                                     | X                                                | X                  |                                                                  |                                          |                                  | X                        | X                  | X                        |                |                                                |                          |                     |
| Campanha-Versiani 2017                                           | X                                      | /                                     | X                                                | X                  | /                                                                |                                          |                                  | X                        | X                  | X                        | X              |                                                |                          | X                   |
| Coleman, 2016                                                    | X                                      | X                                     | X                                                | X                  |                                                                  |                                          | X                                | X                        |                    |                          | X              |                                                |                          |                     |
| Creel, 2016                                                      | X                                      | X                                     | X                                                | X                  | X                                                                |                                          |                                  | X                        |                    |                          | X              | X                                              |                          | X                   |
| DaSilva, 2015                                                    |                                        |                                       |                                                  |                    |                                                                  |                                          |                                  | X                        |                    |                          |                |                                                |                          |                     |
| Egberts, 2010<br>Egberts, 2011                                   | X                                      |                                       | /                                                |                    |                                                                  |                                          |                                  |                          |                    | X                        | /              |                                                |                          |                     |
| Funderburk, 2010                                                 | X                                      | X                                     |                                                  | X                  | X                                                                |                                          |                                  | X-G                      |                    | X                        |                | X                                              |                          |                     |
| Gilbertson, 2020                                                 | X                                      | X                                     | X                                                | X                  |                                                                  |                                          |                                  | X-H                      |                    | X                        | X              | X                                              |                          | X                   |
| Gonzalez-Cutre, 2020                                             | X                                      |                                       | X                                                |                    | X                                                                |                                          | X                                | X                        |                    |                          | X              | X                                              |                          |                     |
| Hanvold, 2019                                                    | X                                      | X                                     | X                                                |                    | X                                                                |                                          |                                  | X                        |                    | X                        | X              | X                                              | X                        | X                   |
| Hassannejad, 2017                                                | X                                      | X                                     | X                                                | X                  | X                                                                |                                          | X                                | X                        |                    |                          | X              | X                                              |                          | X                   |
| Herring, 2017                                                    | X                                      | X                                     | X                                                | X                  | X                                                                |                                          | X                                | X-G                      | X                  | X                        | X              | X                                              |                          | X                   |
| Huck, 2015                                                       | X                                      | X                                     | X                                                | X                  | X                                                                |                                          | X                                | X-1:1i                   | X                  | X                        | X              | X                                              |                          | X                   |
| Jimenez-Loasia, 2020                                             | X                                      | X                                     | X                                                | X                  | X                                                                | X                                        | X                                |                          |                    |                          | X              |                                                |                          |                     |

Supplemental Table 2a. Patient-care-related tasks completed by the exercise professional for each study: Recode and re-review for 14 higher-order themes (HOTS) within 7 super higher-order themes (SHOTS) <sup>1, 2, 3</sup>

|                                                    | EXERCISE-RELATED HEALTH ASSESSMENT     |                                       | BODY COMPOSITION AND PHYSICAL FITNESS ASSESSMENT |                    | LIFESTYLE PHYSICAL AND SEDENTARY BEHAVIOR ASSESSMENT             | EDUCATION, INSTRUCTION, AND PRESCRIPTION |                                  |                          |                    | EXERCISE MONITORING      |                | BEHAVIORAL COUNSELING AND PSYCHOSOCIAL SUPPORT |                          | DIETARY SUPPORT     |
|----------------------------------------------------|----------------------------------------|---------------------------------------|--------------------------------------------------|--------------------|------------------------------------------------------------------|------------------------------------------|----------------------------------|--------------------------|--------------------|--------------------------|----------------|------------------------------------------------|--------------------------|---------------------|
| Citation;<br>(+) primary citation for study series | 1- Risk factor or needs identification | 2- Exercise-Related Health Assessment | 3. Body Composition Assessment                   | 4. Fitness Testing | 5. Lifestyle physical activity and sedentary behavior assessment | 6. Exercise and Fitness Education        | 7. Physical Activity Instruction | 8. Exercise Prescription | 9. Personalization | 10. Metabolic Assessment | 11. Monitoring | 12. Counseling Techniques                      | 13. Psychosocial Support | 14. Dietary Support |
| Kalarchian, 2013                                   | X                                      | X                                     | X                                                |                    | X                                                                |                                          |                                  | X                        |                    |                          | X              | X                                              |                          | X                   |
| Klasnja, 2020                                      | X                                      | /                                     | X                                                |                    | /                                                                |                                          |                                  |                          |                    |                          | X              | X                                              |                          | X                   |
| Marc-Hernandez, 2019                               | X                                      | X                                     | X                                                | X                  | X                                                                | X                                        | X                                | X                        |                    | X                        | X              |                                                |                          |                     |
| Marc-Hernandez 2020                                |                                        |                                       |                                                  |                    |                                                                  |                                          |                                  |                          |                    |                          |                |                                                |                          |                     |
| Marchesi, 2015                                     | X                                      | X                                     | X                                                | X                  |                                                                  |                                          | X                                | X                        | X                  | X                        | X              | X                                              | X                        | X                   |
| Muschitz, 2015                                     | X                                      | X                                     | X                                                |                    |                                                                  | X                                        | X                                | X                        | X                  | X                        | X              | X                                              |                          | X                   |
| Parikh, 2012                                       | X                                      | X                                     | X                                                |                    | X                                                                | X                                        |                                  | X                        |                    | X                        | X              | X                                              | X                        | X                   |
| Pico-Sirvent, 2019                                 | X                                      | X                                     | X                                                | X                  |                                                                  |                                          | X                                | X                        | X                  | X                        | X              |                                                |                          | X                   |
| Proulx, 2018                                       | X                                      |                                       | X                                                |                    | X                                                                |                                          |                                  | X                        | X                  | X                        | X              | X                                              |                          | X                   |
| Rothwell, 2015                                     | X                                      |                                       | X                                                |                    |                                                                  | X                                        | X                                | X-H                      |                    |                          | X              |                                                |                          |                     |
| Soriano-Maldonado, 2020                            | X                                      | X                                     | X                                                | X                  | X                                                                |                                          |                                  | X                        |                    | X                        | X              |                                                |                          | X                   |
| Stegen, 2011                                       | X                                      | X                                     | X                                                | X                  |                                                                  |                                          | X                                | X                        | X                  | X                        | X              |                                                |                          |                     |
| Villa-González, 2019                               | X                                      |                                       | X                                                |                    |                                                                  |                                          | X                                | X                        | X                  | X                        | X              | X                                              |                          | X                   |
| Artero, 2021                                       |                                        |                                       |                                                  |                    |                                                                  |                                          |                                  |                          |                    |                          |                |                                                |                          |                     |
|                                                    | 28/29;<br>97%                          | 22/29;<br>76%                         | 27/29;<br>93%                                    | 16/29;<br>55%      | 17/29;<br>59%                                                    | 6/29;<br>21%                             | 14/29;<br>48%                    | 24/29;<br>83%            | 11/29;<br>38%      | 18/29;<br>62%            | 25/29;<br>86%  | 18/29;<br>62%                                  | 3/29;<br>10%             | 19/29;<br>34%       |
|                                                    |                                        |                                       |                                                  |                    |                                                                  |                                          |                                  |                          |                    |                          |                |                                                |                          |                     |
| GRAND TOTAL                                        | 53/54;<br>98%                          | 46/54;<br>85%                         | 52/54;<br>96%                                    | 39/54;<br>72%      | 34/54;<br>63%                                                    | 19/54;<br>35%                            | 30/54;<br>56%                    | 49/54;<br>91%            | 24/54;<br>44%      | 35/54;<br>65%            | 50/54;<br>93%  | 30/54;<br>56%                                  | 5/54;<br>9%              | 28/54;<br>44%       |

Supplemental Table 2a. Patient-care-related tasks completed by the exercise professional for each study: Recode and re-review for 14 higher-order themes (HOTS) within 7 super higher-order themes (SHOTS) <sup>1, 2, 3</sup>

|                                                                             | EXERCISE-RELATED HEALTH ASSESSMENT      |                                       | BODY COMPOSITION AND PHYSICAL FITNESS ASSESSMENT |                    | LIFESTYLE PHYSICAL AND SEDENTARY BEHAVIOR ASSESSMENT             | EDUCATION, INSTRUCTION, AND PRESCRIPTION |                                  |                          |                    | EXERCISE MONITORING      |                | BEHAVIORAL COUNSELING AND PSYCHOSOCIAL SUPPORT |                          | DIETARY SUPPORT     |
|-----------------------------------------------------------------------------|-----------------------------------------|---------------------------------------|--------------------------------------------------|--------------------|------------------------------------------------------------------|------------------------------------------|----------------------------------|--------------------------|--------------------|--------------------------|----------------|------------------------------------------------|--------------------------|---------------------|
| Citation;<br>(+) primary citation for study series                          | 1- Risk factor and needs identification | 2- Exercise-Related Health Assessment | 3. Body Composition Assessment                   | 4. Fitness Testing | 5. Lifestyle physical activity and sedentary behavior assessment | 6. Exercise and Fitness Education        | 7. Physical Activity instruction | 8. Exercise Prescription | 9. Personalization | 10. Metabolic Assessment | 11. Monitoring | 12. Counseling Techniques                      | 13. Psychosocial Support | 14. Dietary Support |
| <sup>1</sup> : Hamdy (2018) was not included because it was a review paper. |                                         |                                       |                                                  |                    |                                                                  |                                          |                                  |                          |                    |                          |                |                                                |                          |                     |
| <sup>2</sup> : See Table 2b for coding                                      |                                         |                                       |                                                  |                    |                                                                  |                                          |                                  |                          |                    |                          |                |                                                |                          |                     |
| <sup>3</sup> : GREEN = EX PHYSIOLOGISTS; PHYSIOTHERAPISTS IN PEACH;         |                                         |                                       |                                                  |                    |                                                                  |                                          |                                  |                          |                    |                          |                |                                                |                          |                     |

1020

1021

1022

| <b>Supplementary Table 2b: Coding for Table 2a</b> |                                    |                                                                 |                                |                                                                                          |                                   |
|----------------------------------------------------|------------------------------------|-----------------------------------------------------------------|--------------------------------|------------------------------------------------------------------------------------------|-----------------------------------|
|                                                    | X: Explicitly stated<br>/: Implied | Setting                                                         | Standardized vs Individualized | Example format                                                                           | Note                              |
| X-G                                                | Explicitly stated;                 | Group setting                                                   | Standardized, by definition!   | classroom setting; clinic; hospital                                                      |                                   |
| X-1:1                                              | Explicitly stated;                 | 1-on-1 training                                                 | Standardized                   | Exam room at clinic, hospital recovery                                                   |                                   |
| X-1:1i                                             | Explicitly stated;                 | 1-on-1 training                                                 | Individualized                 | Exam room at clinic, hospital recovery                                                   |                                   |
| X-O                                                | Explicitly stated                  | Online (independent- without the exercise professional present) | Standardized                   | Video tutorials                                                                          |                                   |
| X-Oi                                               | Explicitly stated                  | Online                                                          | Individualized                 | Interactive/automated digital systems                                                    | None of the studies may have this |
| X-H                                                | Explicitly stated                  | Home (independent- without the exercise professional present)   | Standardized                   | Ex Rx they are given to do at home, same for everyone (similar to Info Sheet, below)     |                                   |
| X-Hi                                               | Explicitly stated                  | Home (independent- without the exercise professional present)   | Individualized                 | Home Exercise Program (HEP) given at discharge, similar to what physical therapists give |                                   |
| X-T                                                | Explicitly stated                  | telephone or video-conferencing                                 | Standardized                   | Zoom group                                                                               |                                   |
| X-Ti                                               | Explicitly stated                  | telephone or video-conferencing                                 | individualized                 | Zoom one-on-one                                                                          |                                   |
| X-IS                                               | Explicitly stated                  | Info sheet                                                      | Standardized, by definition!   | Just informational, not a program, per se, like above.                                   |                                   |

1023

1024

1025
